# Supplementary material for: The impact of an extended nucleobase-2′-deoxyribose linker in the biophysical and biological properties of oligonucleotides
Source: Royal Society of Chemistry journal article supplement (doi:10.1039/c6ra26852h), 2017-01-01

## The impact of extended nucleobase-ribose linkers in the biophysical and biological properties of oligonucleotides

Alejandro Carnero,<sup>a,#</sup> Sónia Pérez-Rentero,<sup>b,c,#</sup> Adele Alagia,<sup>b,c</sup> Anna Aviñó,<sup>b,c</sup> Yogesh S. Sanghvi,<sup>d</sup> Susana Fernández,<sup>a</sup> Miguel Ferrero,<sup>a,\*</sup> and Ramon Eritja<sup>b,c,\*</sup>

<sup>a</sup>*Departamento de Química Orgánica e Inorgánica and Instituto Universitario de Biotecnología de Asturias, Universidad de Oviedo, Avenida Julián de Clavería 8, 33006-Oviedo (Asturias), Spain*

<sup>b</sup>*Dpt. Chemical & Biomolecular Nanotechnology, Institute for Advanced Chemistry of Catalonia (IQAC), CSIC, 08034-Barcelona, Spain*

<sup>c</sup>*CIBER-BBN Networking Centre on Bioengineering, Biomaterials and Nanomedicine, 08034-Barcelona, Spain*

<sup>d</sup>*Rasayan Inc., 2802 Crystal Ridge Road, Encinitas, CA 92024-6615, USA*

<sup>#</sup>The authors wish it to be known that, in their opinion, the first two authors should be regarded as joint first authors as they equally contributed to the work.

M.F.: mferrero@uniovi.es; R.E.: recgma@cid.csic.es.

### SUPPORTING INFORMATION (page 1 of 31 pages)

#### Table of Contents

##### COPIES OF 1D AND 2D NMR SPECTRA OF COMPOUNDS:

|                                       |     |                                       |     |
|---------------------------------------|-----|---------------------------------------|-----|
| <sup>1</sup> H NMR of <b>2</b> .....  | S2  | <sup>13</sup> C NMR of <b>4</b> ..... | S15 |
| <sup>13</sup> C NMR of <b>2</b> ..... | S3  | DEPT NMR of <b>4</b> .....            | S16 |
| DEPT NMR of <b>2</b> .....            | S4  | COSY NMR of <b>4</b> .....            | S17 |
| COSY NMR of <b>2</b> .....            | S5  | HSQC NMR of <b>4</b> .....            | S18 |
| HSQC NMR of <b>2</b> .....            | S6  | HMBC NMR of <b>4</b> .....            | S19 |
| HMBC NMR of <b>2</b> .....            | S7  | <sup>1</sup> H NMR of <b>5</b> .....  | S20 |
| <sup>1</sup> H NMR of <b>3</b> .....  | S8  | <sup>13</sup> C NMR of <b>5</b> ..... | S21 |
| <sup>13</sup> C NMR of <b>3</b> ..... | S9  | DEPT NMR of <b>5</b> .....            | S22 |
| DEPT NMR of <b>3</b> .....            | S10 | COSY NMR of <b>5</b> .....            | S23 |
| COSY NMR of <b>3</b> .....            | S11 | HSQC NMR of <b>5</b> .....            | S24 |
| HSQC NMR of <b>3</b> .....            | S12 | HMBC NMR of <b>5</b> .....            | S25 |
| HMBC NMR of <b>3</b> .....            | S13 | <sup>31</sup> P NMR of <b>6</b> ..... | S26 |
| <sup>1</sup> H NMR of <b>4</b> .....  | S14 |                                       |     |

##### COPIES OF MALDI-TOF MASS SPECTRA:

|                                |     |
|--------------------------------|-----|
| MALDI-TOF of 15Mer_T*(01)..... | S27 |
| MALDI-TOF of 15Mer_T*(02)..... | S28 |
| MALDI-TOF of 15Mer_T*(03)..... | S29 |
| MALDI-TOF of ASmd.....         | S30 |
| MALDI-TOF of SSmd.....         | S31 |

1 $\beta$ -Aminomethyl-1,2-dideoxy-3,5-di-*O*-toluoyl-D-ribose (2)

$^1\text{H}$  NMR (300.13 MHz,  $\text{CDCl}_3$ )

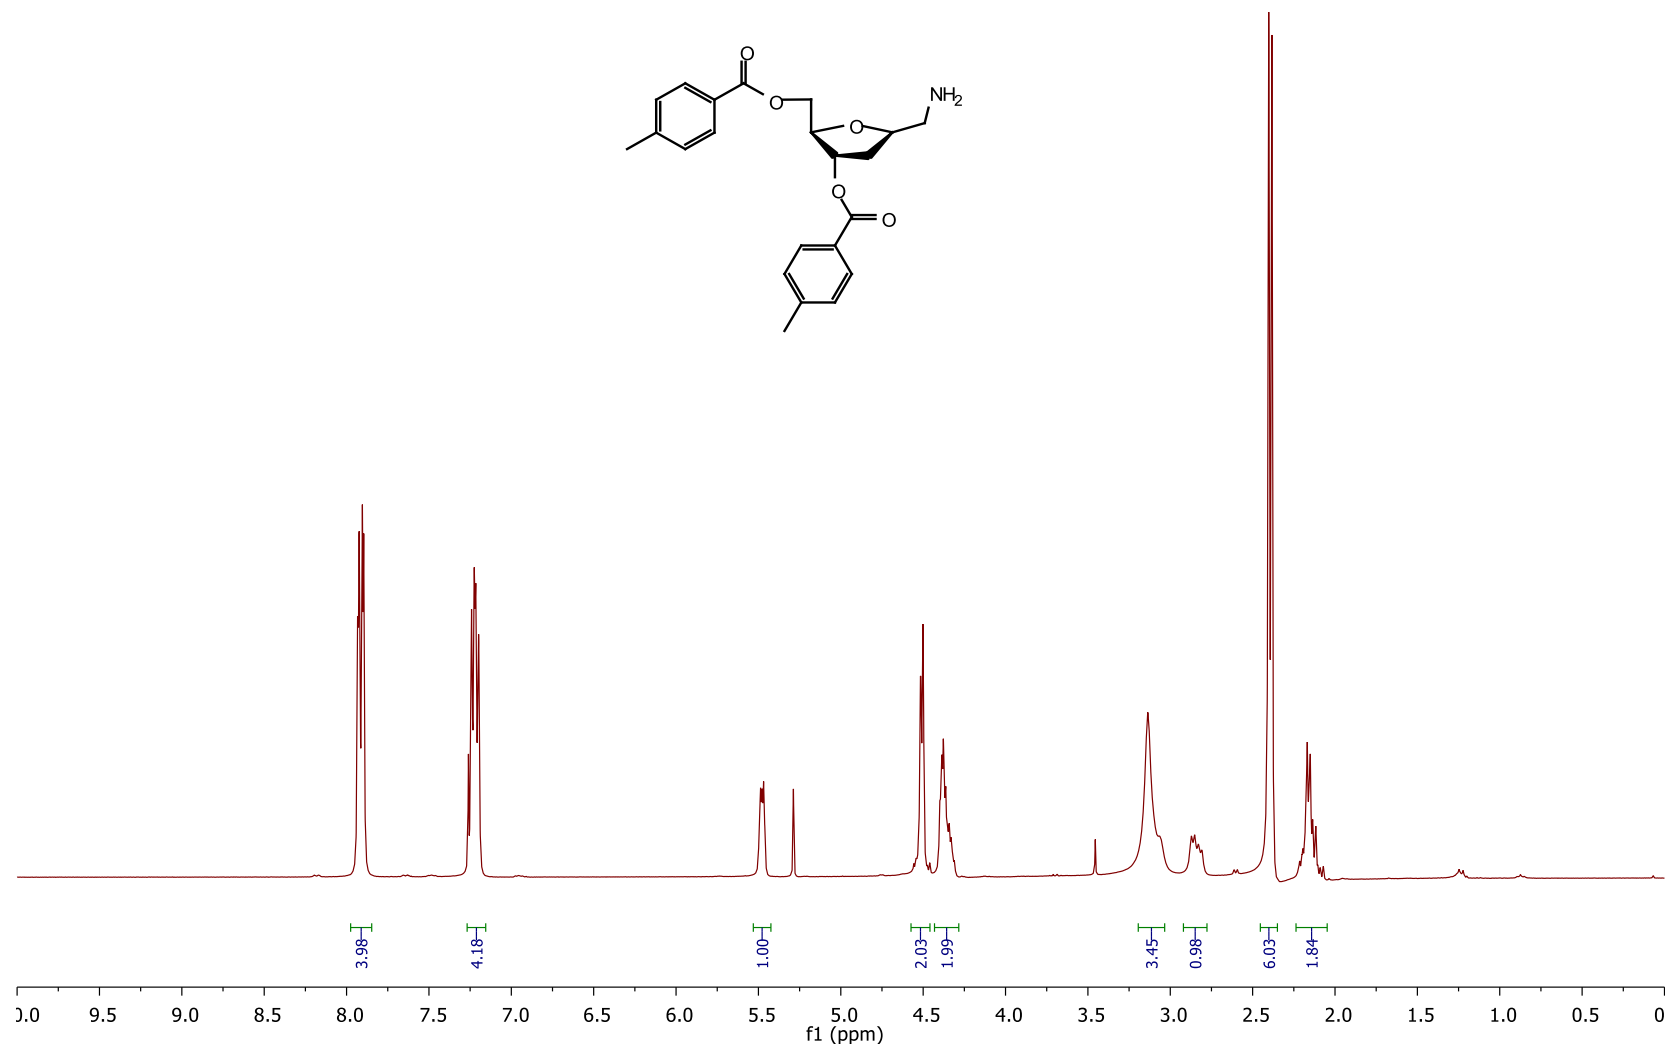

1 $\beta$ -Aminomethyl-1,2-dideoxy-3,5-di-*O*-toluoyl-D-ribose (2)

<sup>13</sup>C NMR (75.5 MHz, CDCl<sub>3</sub>)

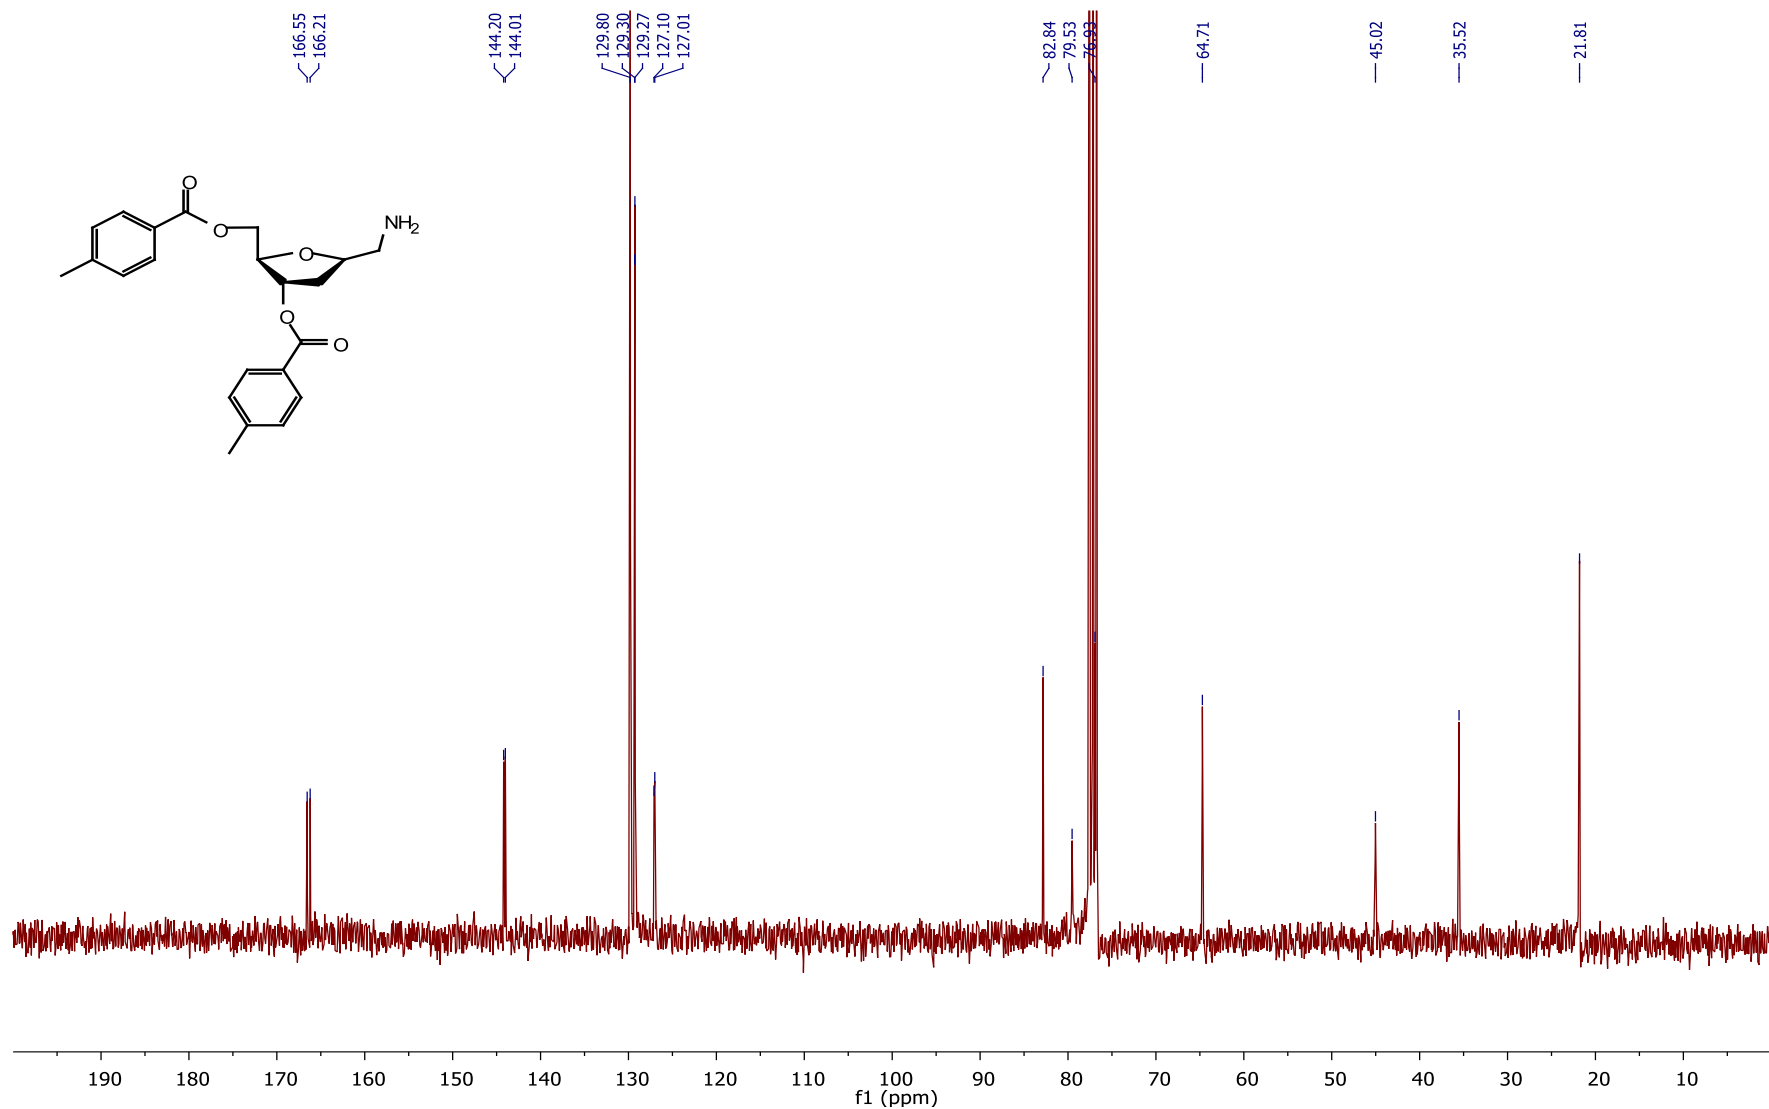

1 $\beta$ -Aminomethyl-1,2-dideoxy-3,5-di-*O*-toluoyl-D-ribose (2)

DEPT NMR (75.5 MHz, CDCl<sub>3</sub>)

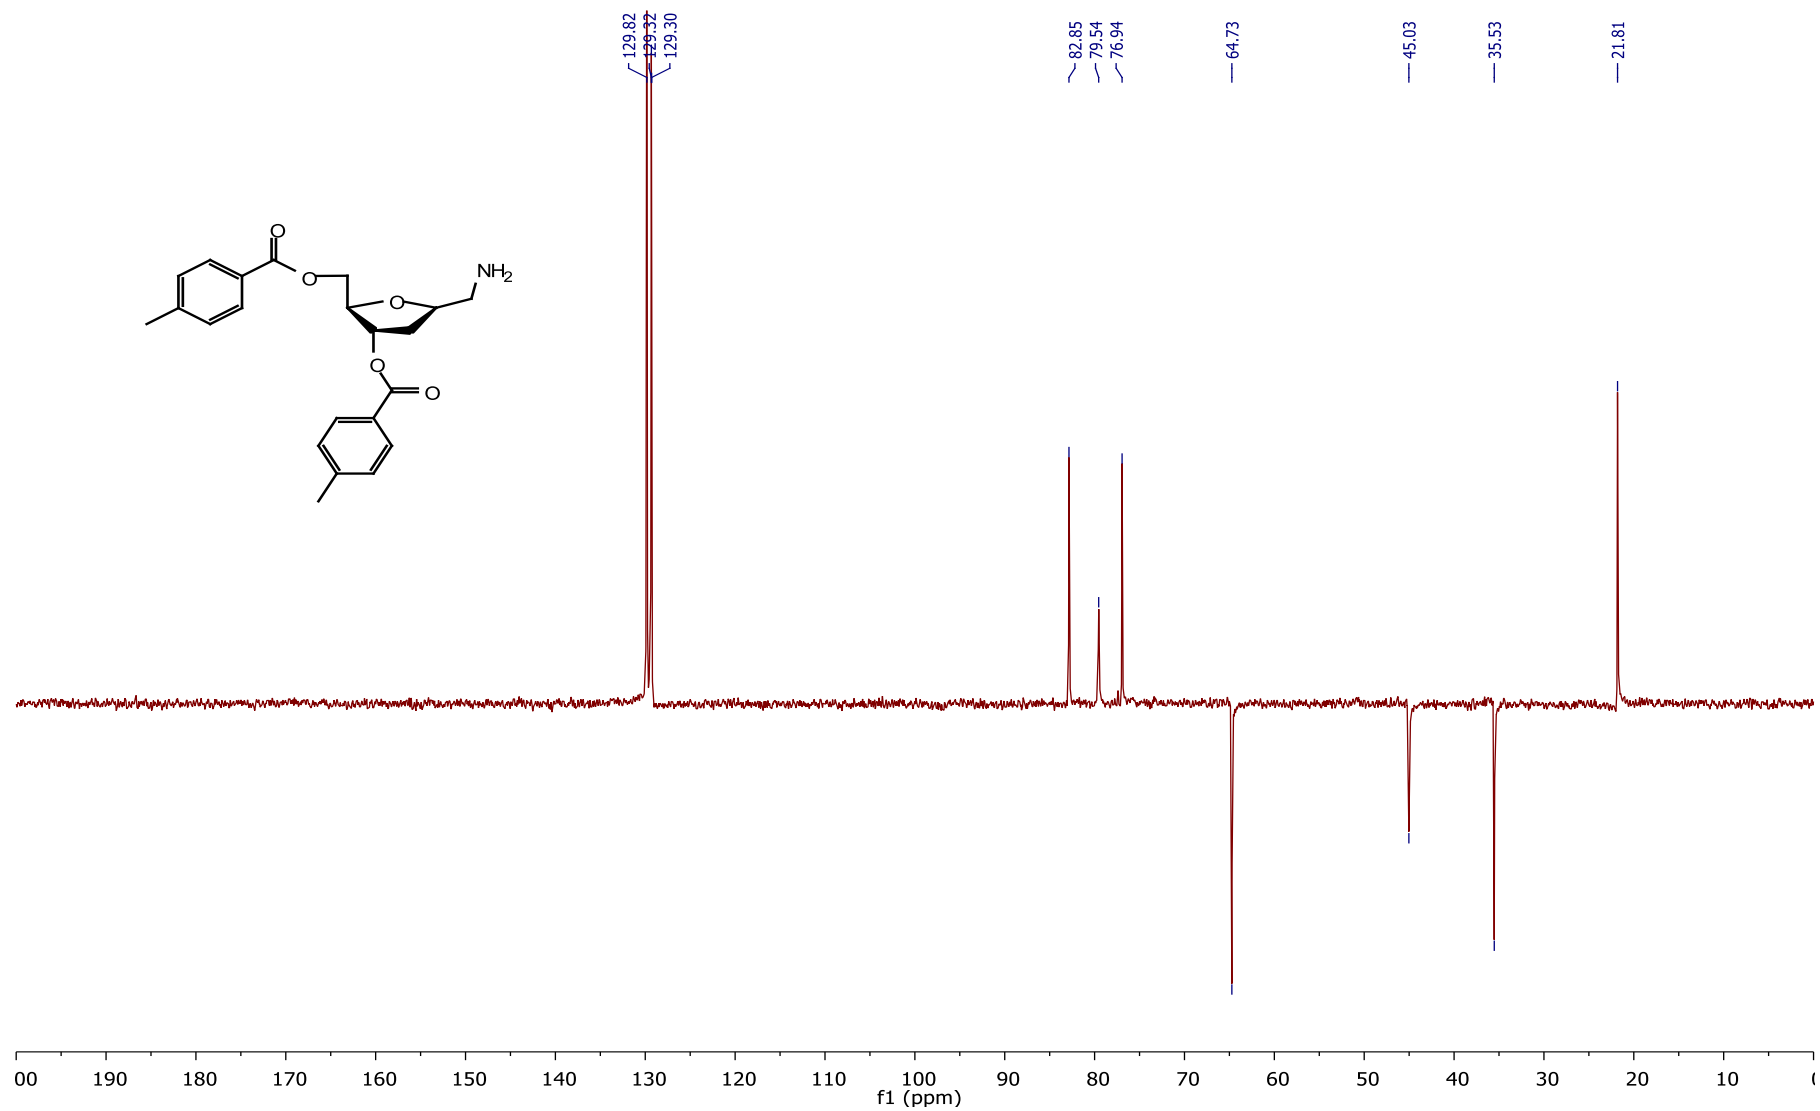

1 $\beta$ -Aminomethyl-1,2-dideoxy-3,5-di-*O*-toluoyl-D-ribose (2)

COSY NMR (CDCl<sub>3</sub>)

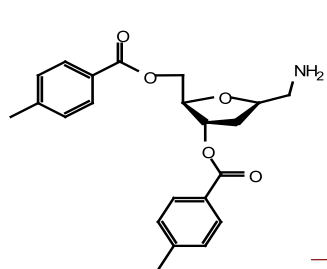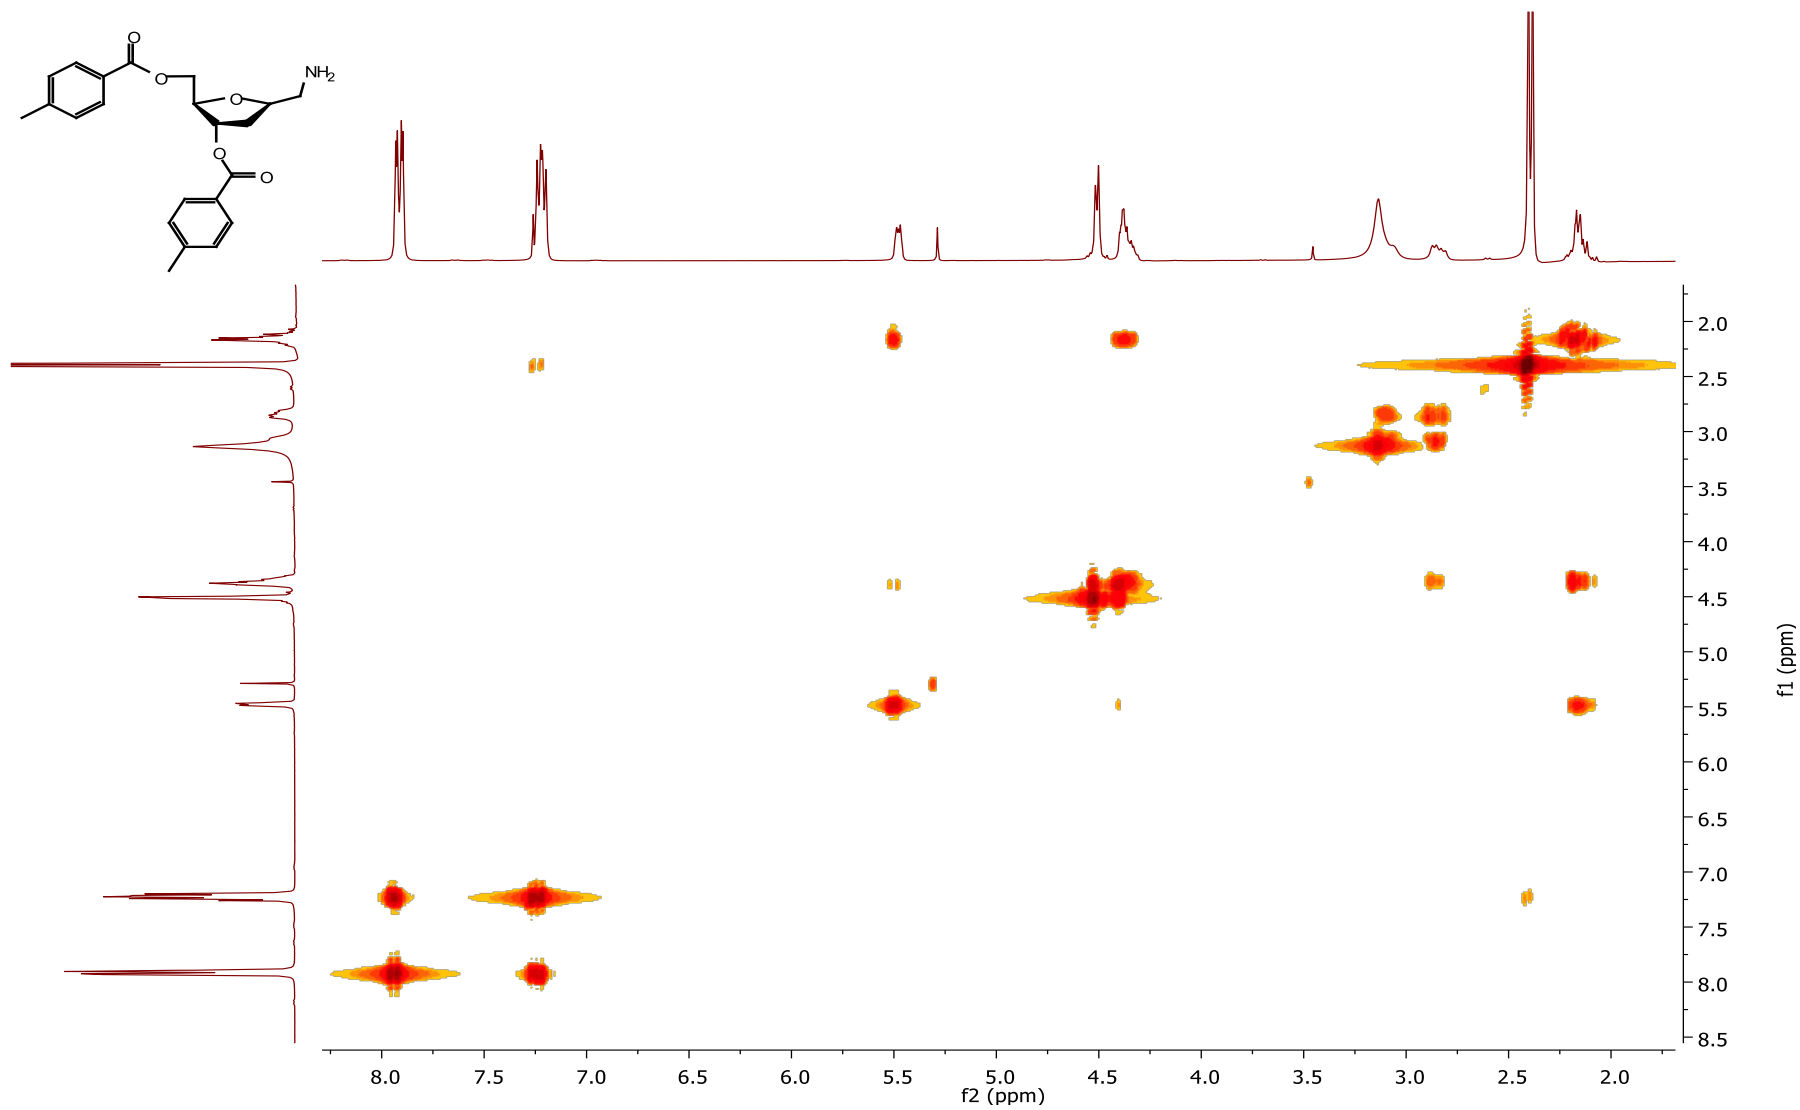

1 $\beta$ -Aminomethyl-1,2-dideoxy-3,5-di-*O*-toluoyl-D-ribose (2)

HSQC NMR (CDCl<sub>3</sub>)

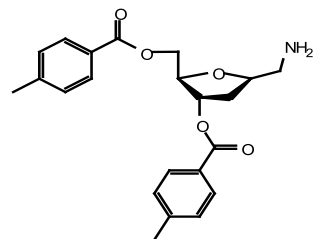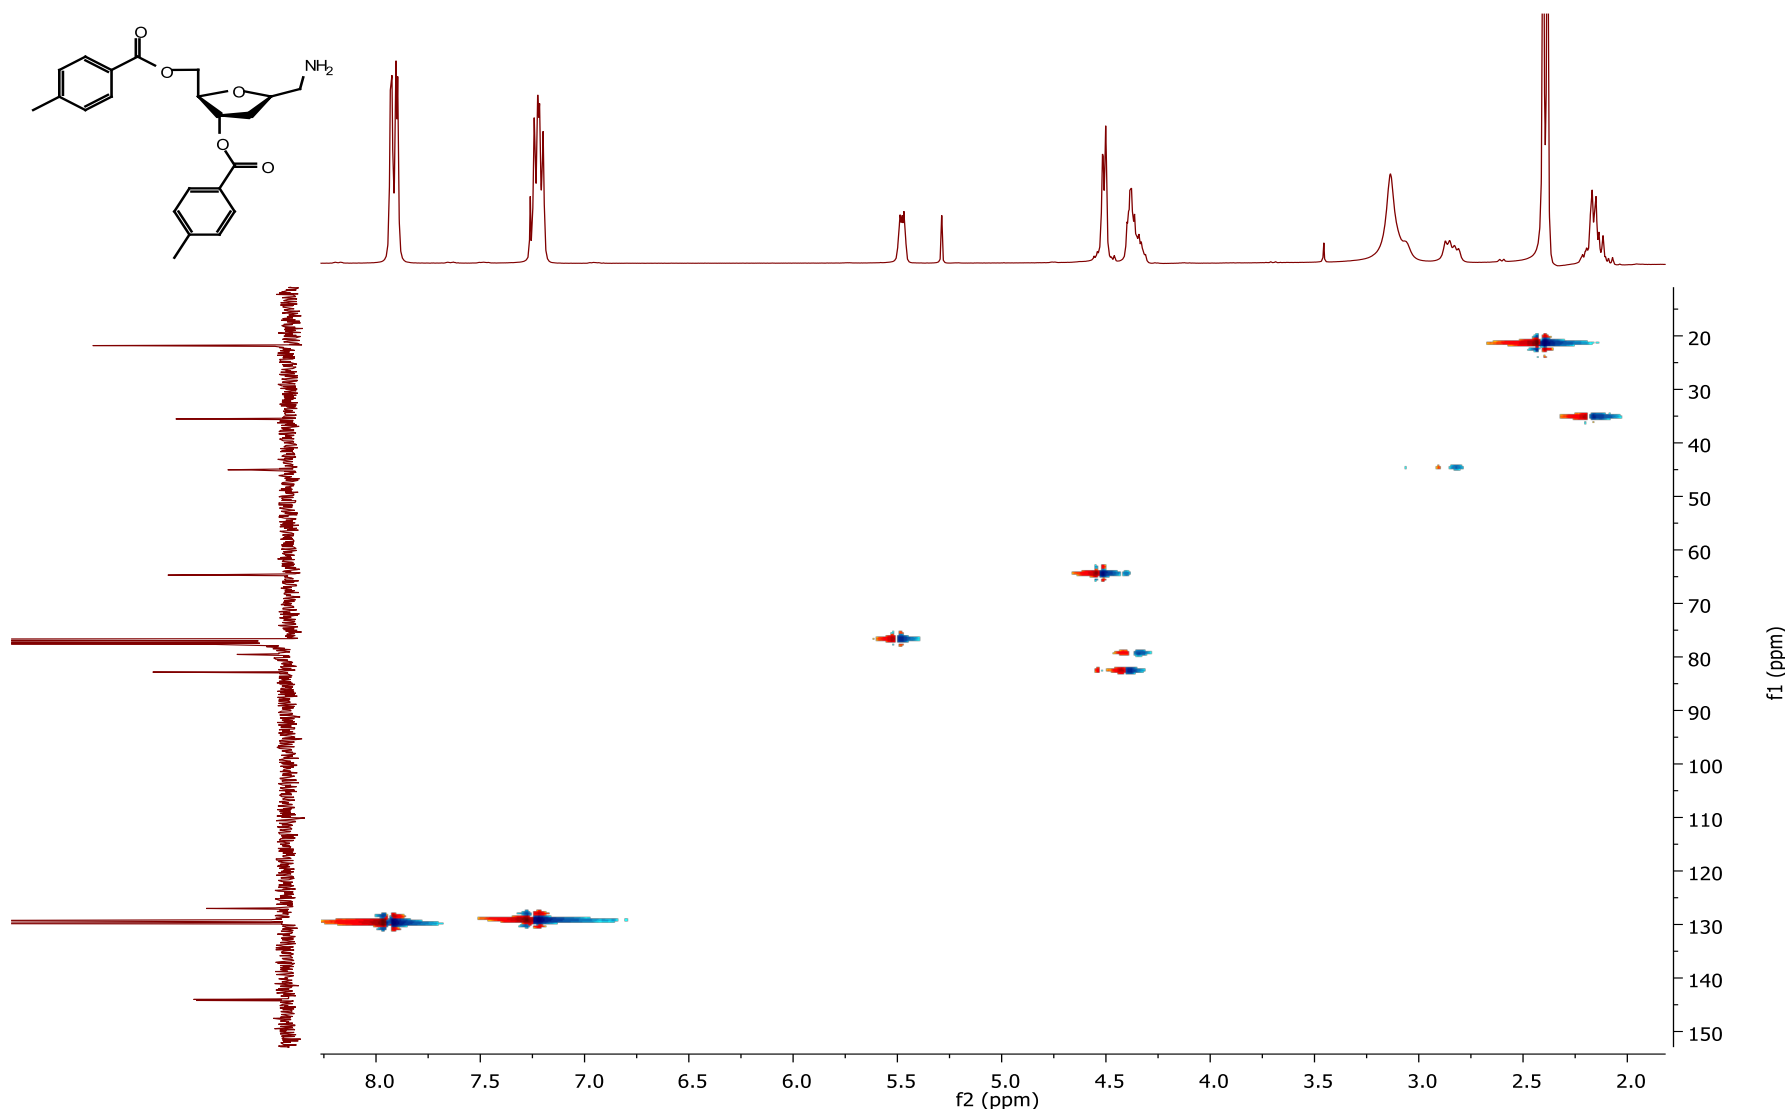

1 $\beta$ -Aminomethyl-1,2-dideoxy-3,5-di-*O*-toluoyl-D-ribose (2)

HMBC NMR (CDCl<sub>3</sub>)

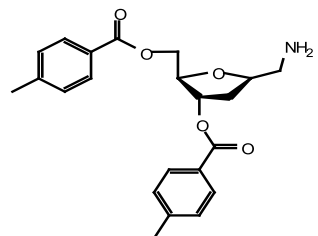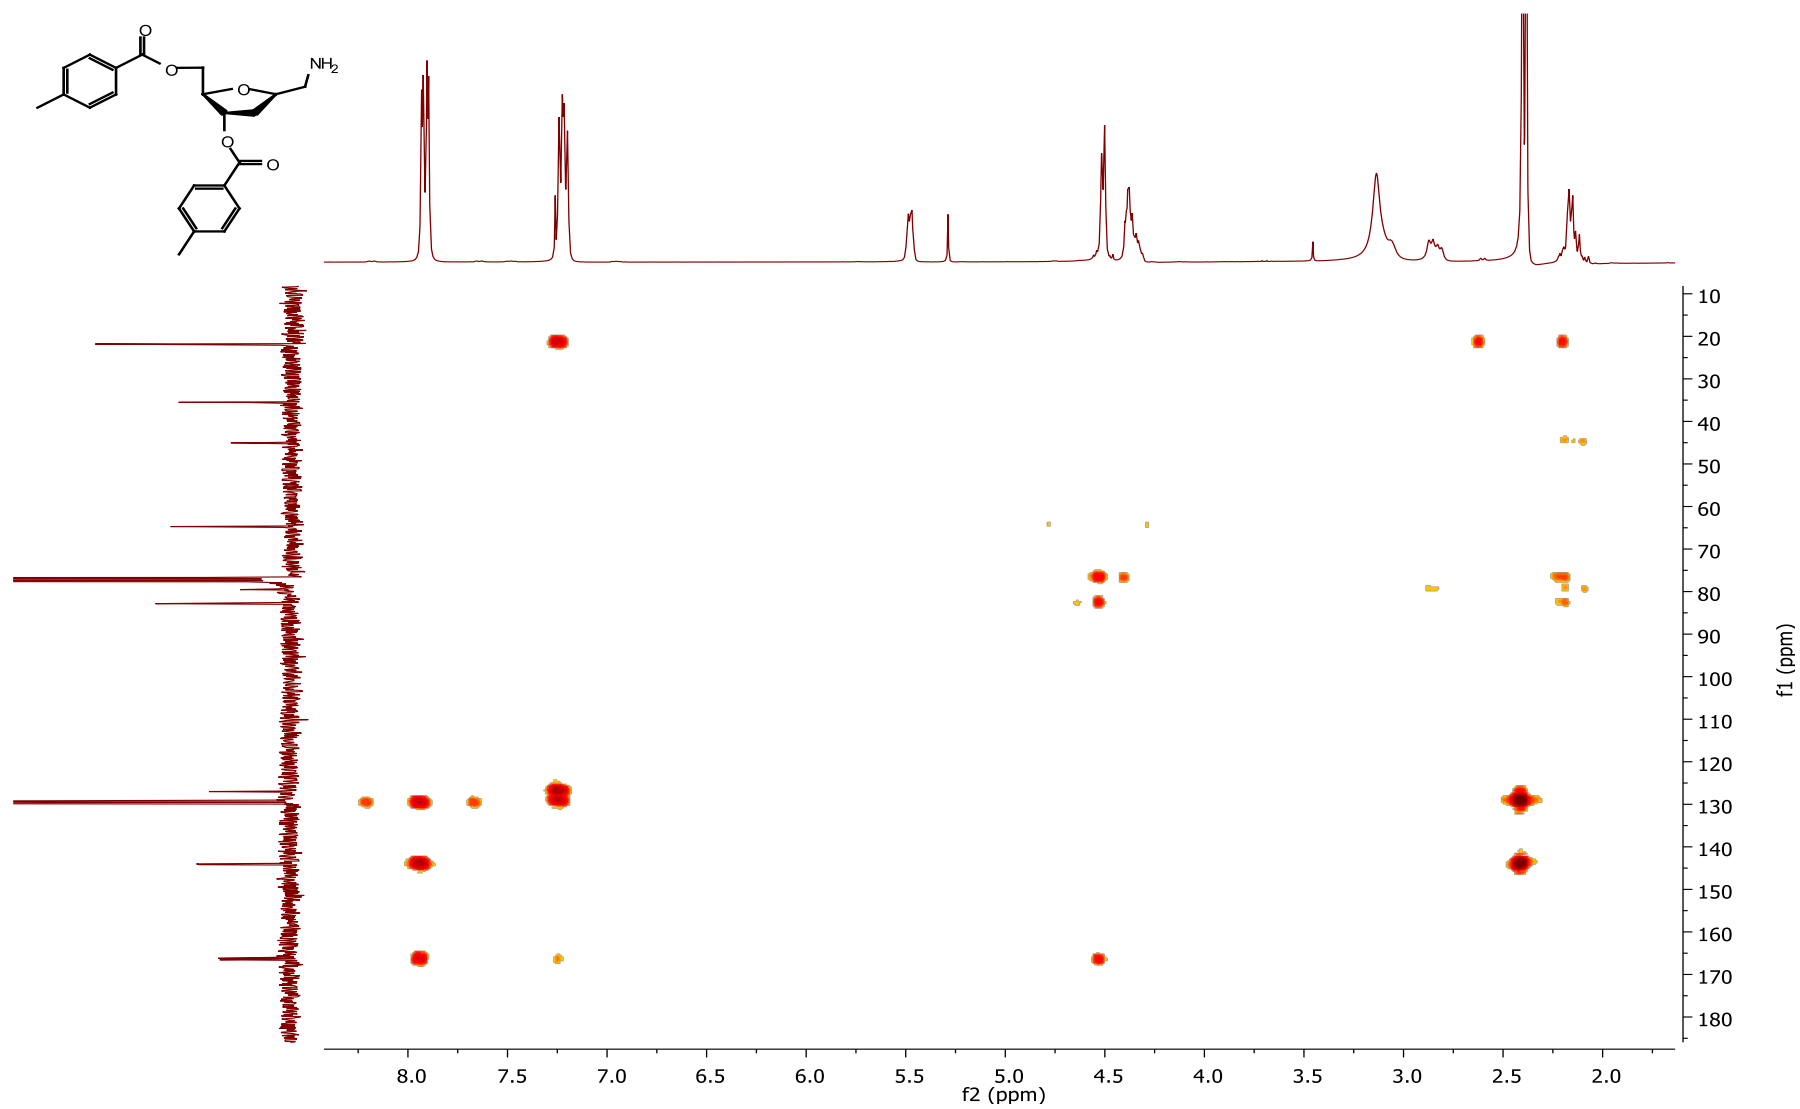

1,2-Dideoxy-1 $\beta$ -[*N*-(1-thyminylacetyl)aminomethyl]-3,5-di-*O*-toluoyl-D-ribose (3)

$^1\text{H}$  NMR (300.13 MHz,  $\text{CDCl}_3$ )

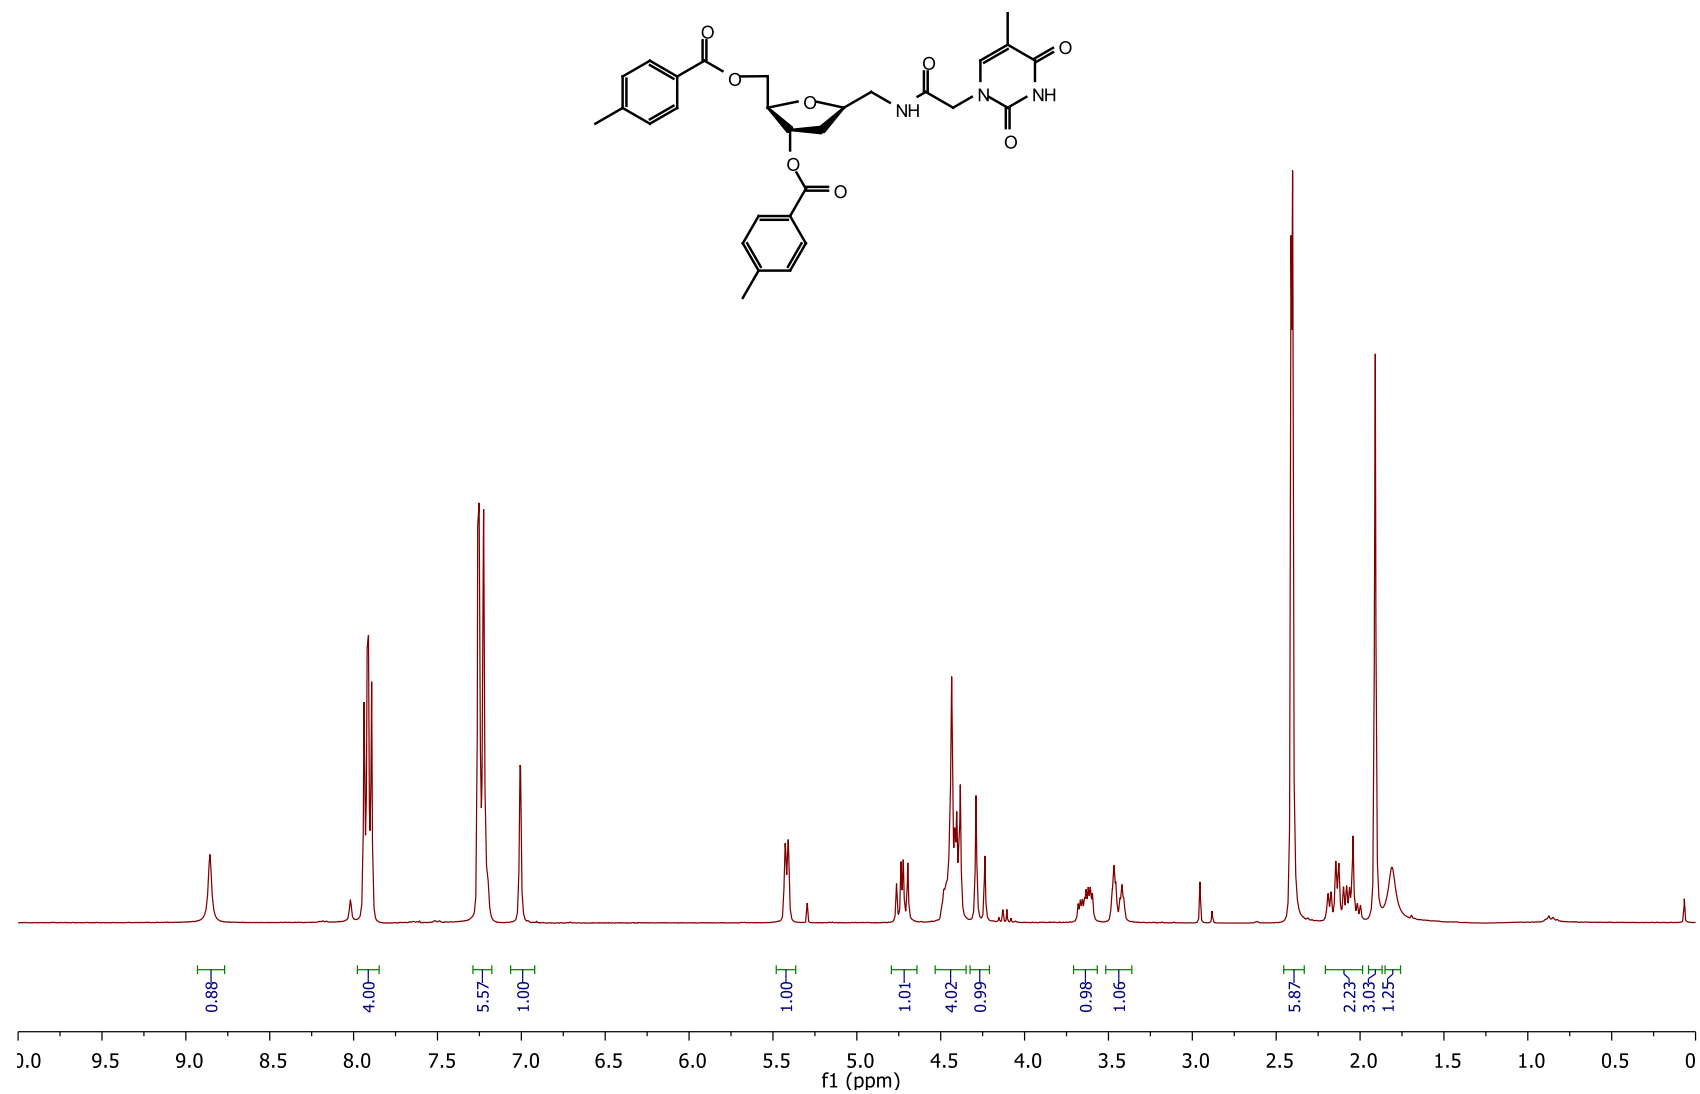



1,2-Dideoxy-1 $\beta$ -[N-(1-thyminylacetyl)aminomethyl]-3,5-di-O-toluoyl-D-ribose (3)

$^{13}\text{C}$  NMR (75.5 MHz,  $\text{CDCl}_3$ )

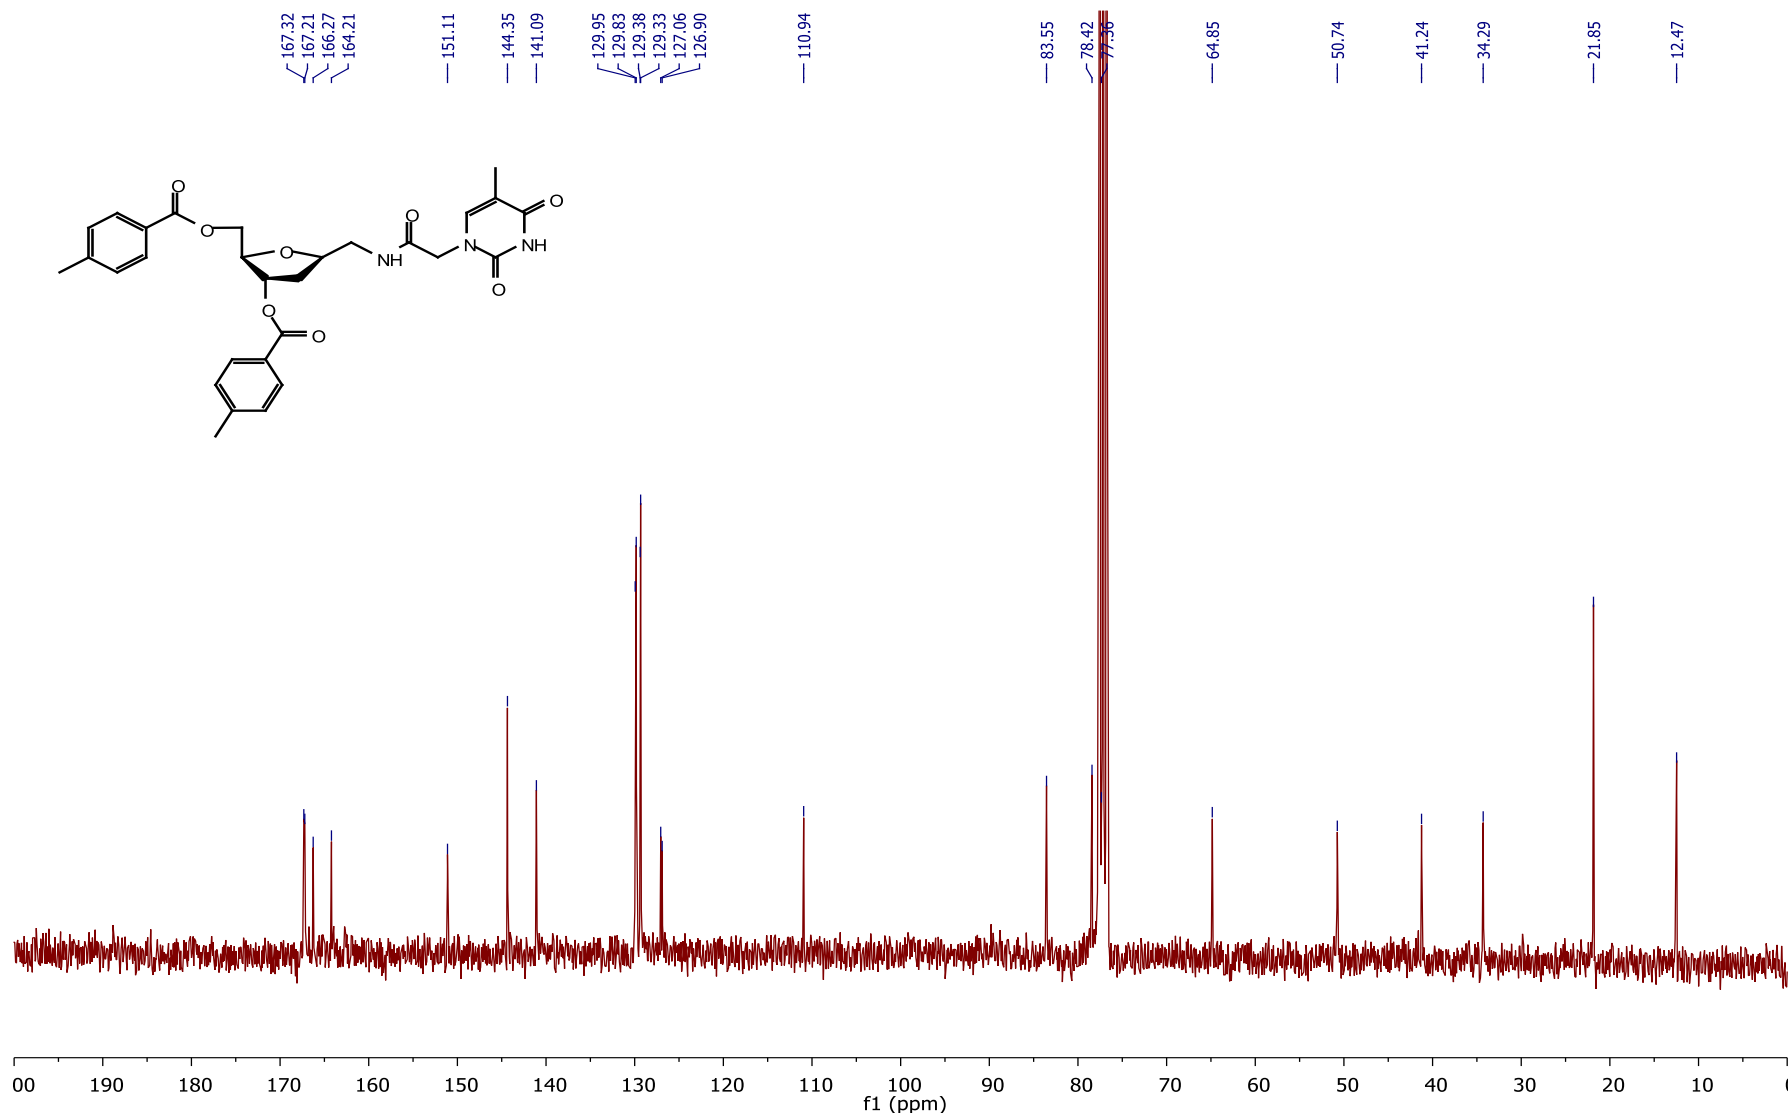

1,2-Dideoxy-1 $\beta$ -[*N*-(1-thyminylacetyl)aminomethyl]-3,5-di-*O*-toluoyl-D-ribose (3)

DEPT NMR (75.5 MHz, CDCl<sub>3</sub>)

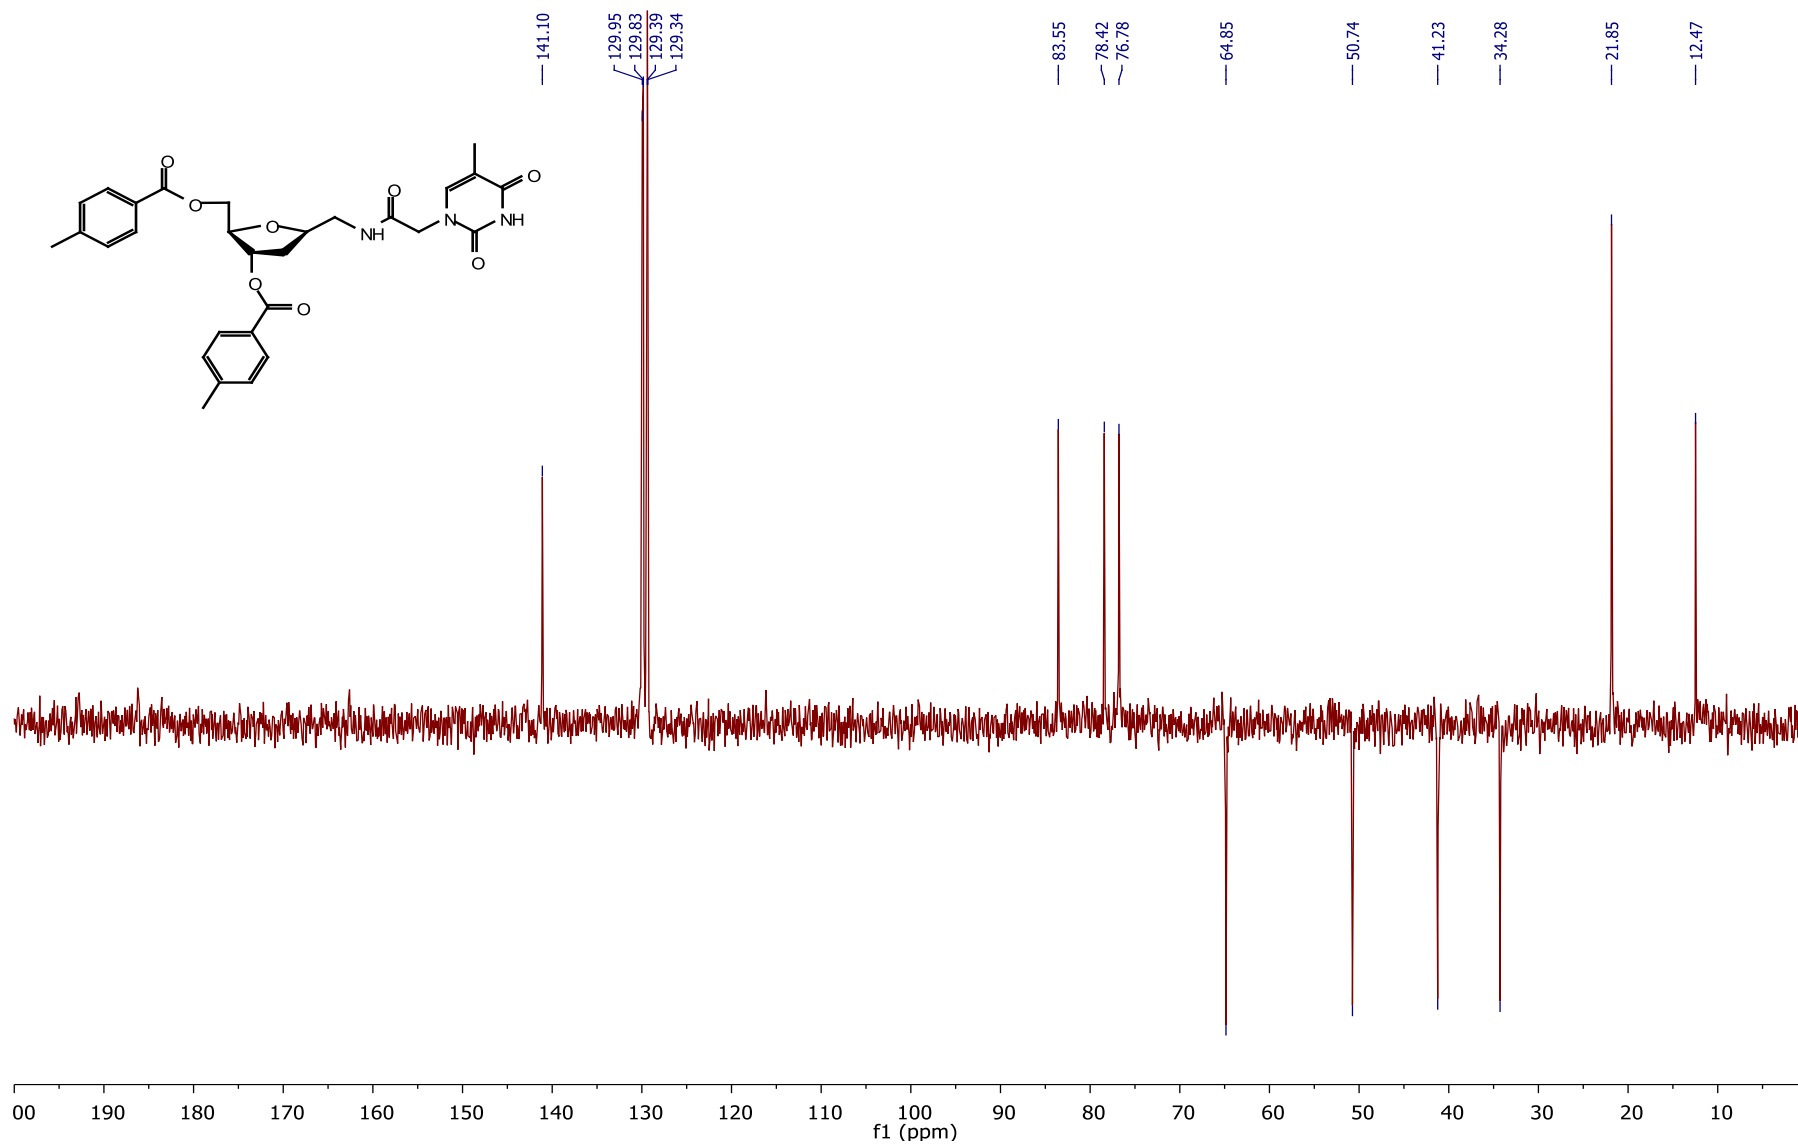

1,2-Dideoxy-1 $\beta$ -[*N*-(1-thyminylacetyl)aminomethyl]-3,5-di-*O*-toluoyl-D-ribose (3)

COSY NMR (CDCl<sub>3</sub>)

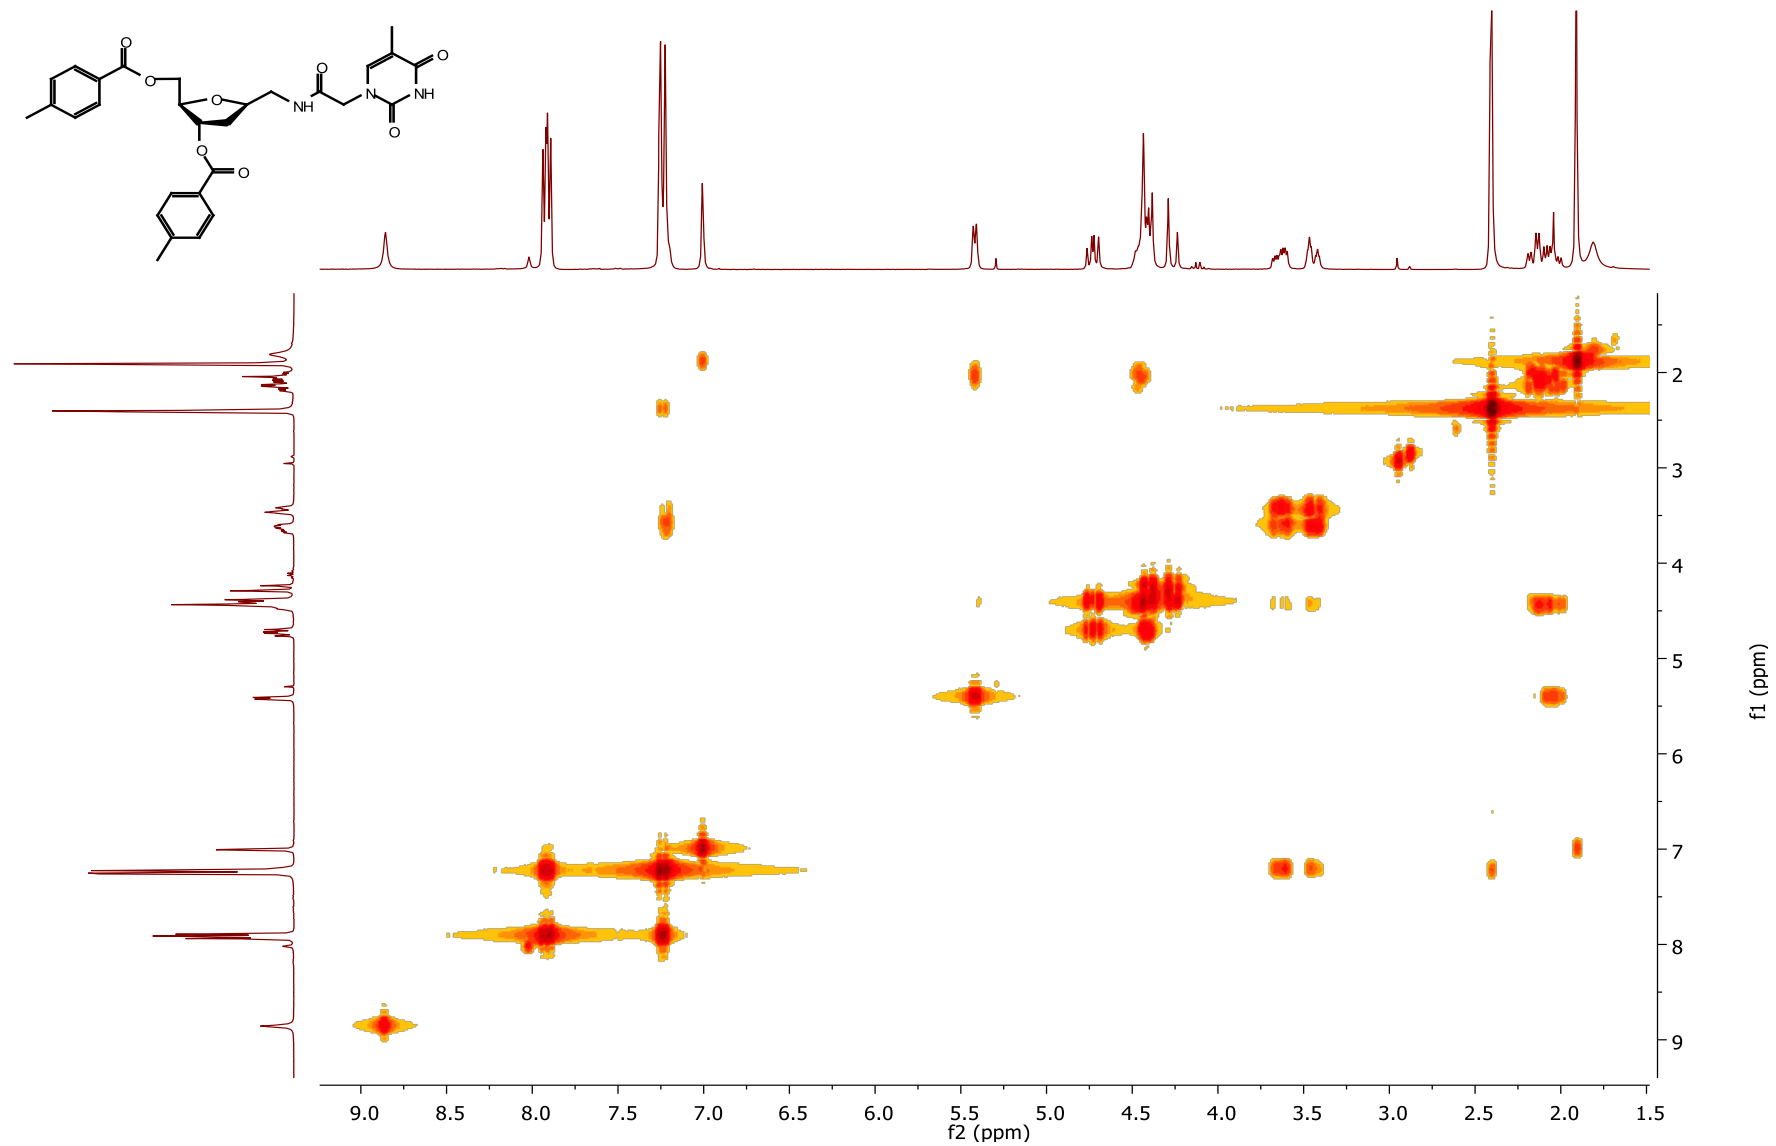

1,2-Dideoxy-1 $\beta$ -[*N*-(1-thyminylacetyl)aminomethyl]-3,5-di-*O*-toluoyl-D-ribose (3)

HSQC NMR (CDCl<sub>3</sub>)

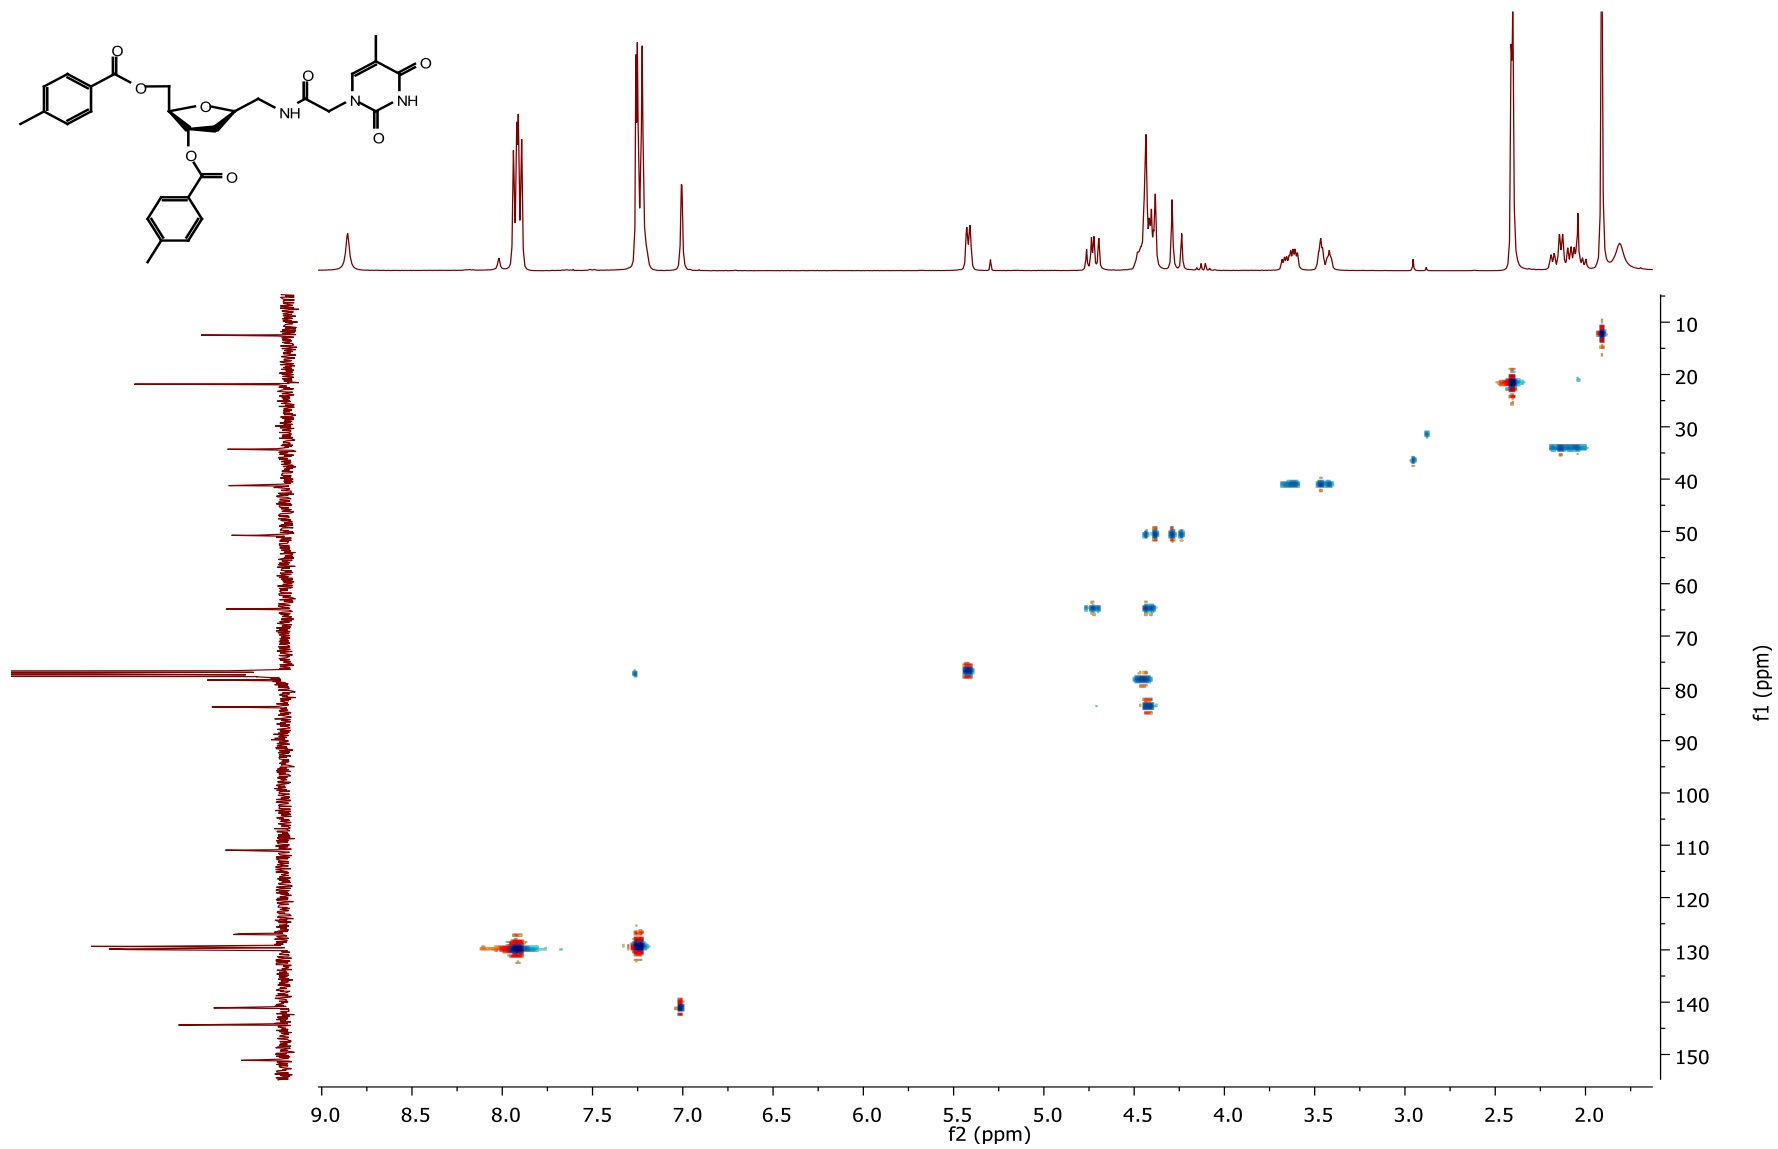

1,2-Dideoxy-1 $\beta$ -[*N*-(1-thyminylacetyl)aminomethyl]-3,5-di-*O*-toluoyl-D-ribose (3)

HMBC NMR (CDCl<sub>3</sub>)

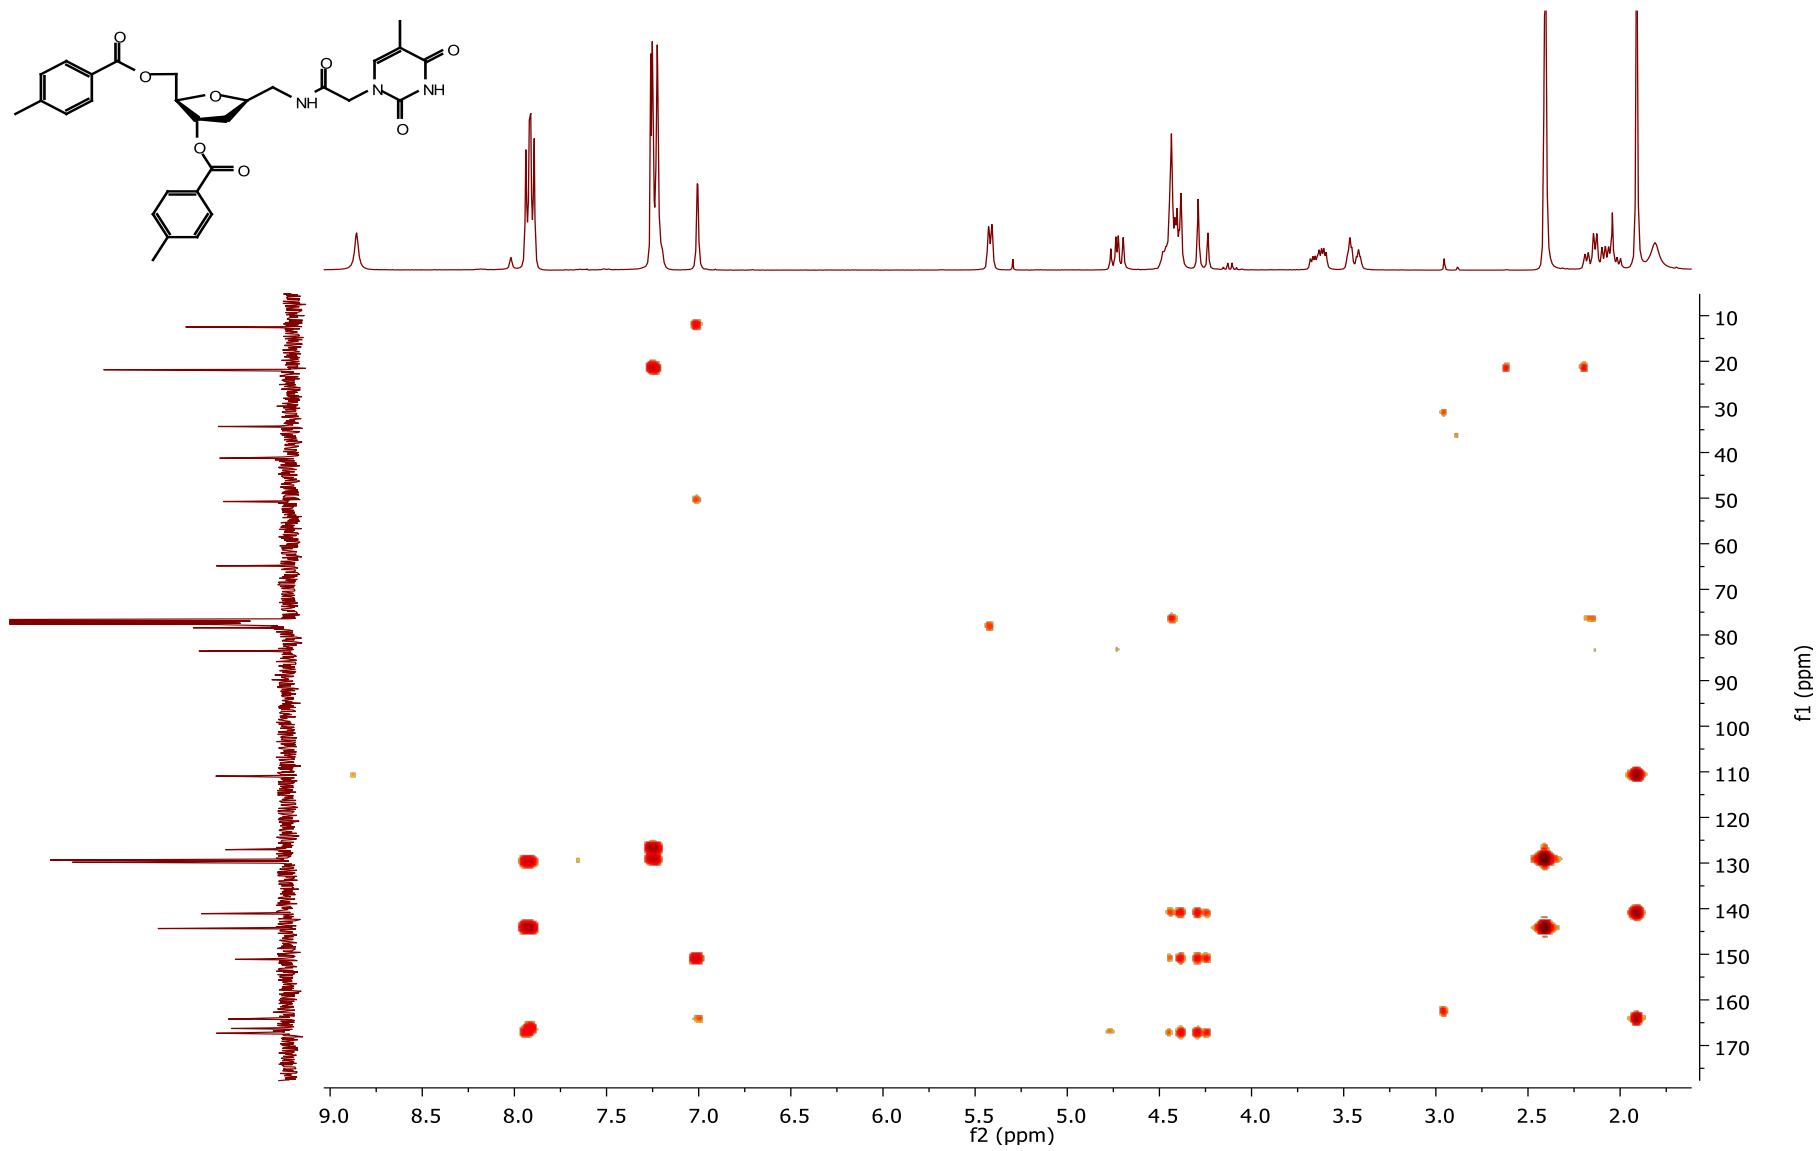

1,2-Dideoxy-1 $\beta$ -[N-(1-thyminylacetyl)aminomethyl]-D-ribose (4)

$^1\text{H}$  NMR (300.13 MHz, MeOH- $d_4$ )

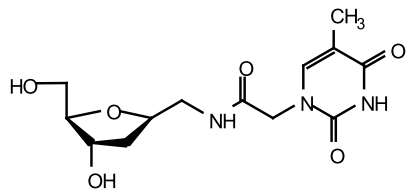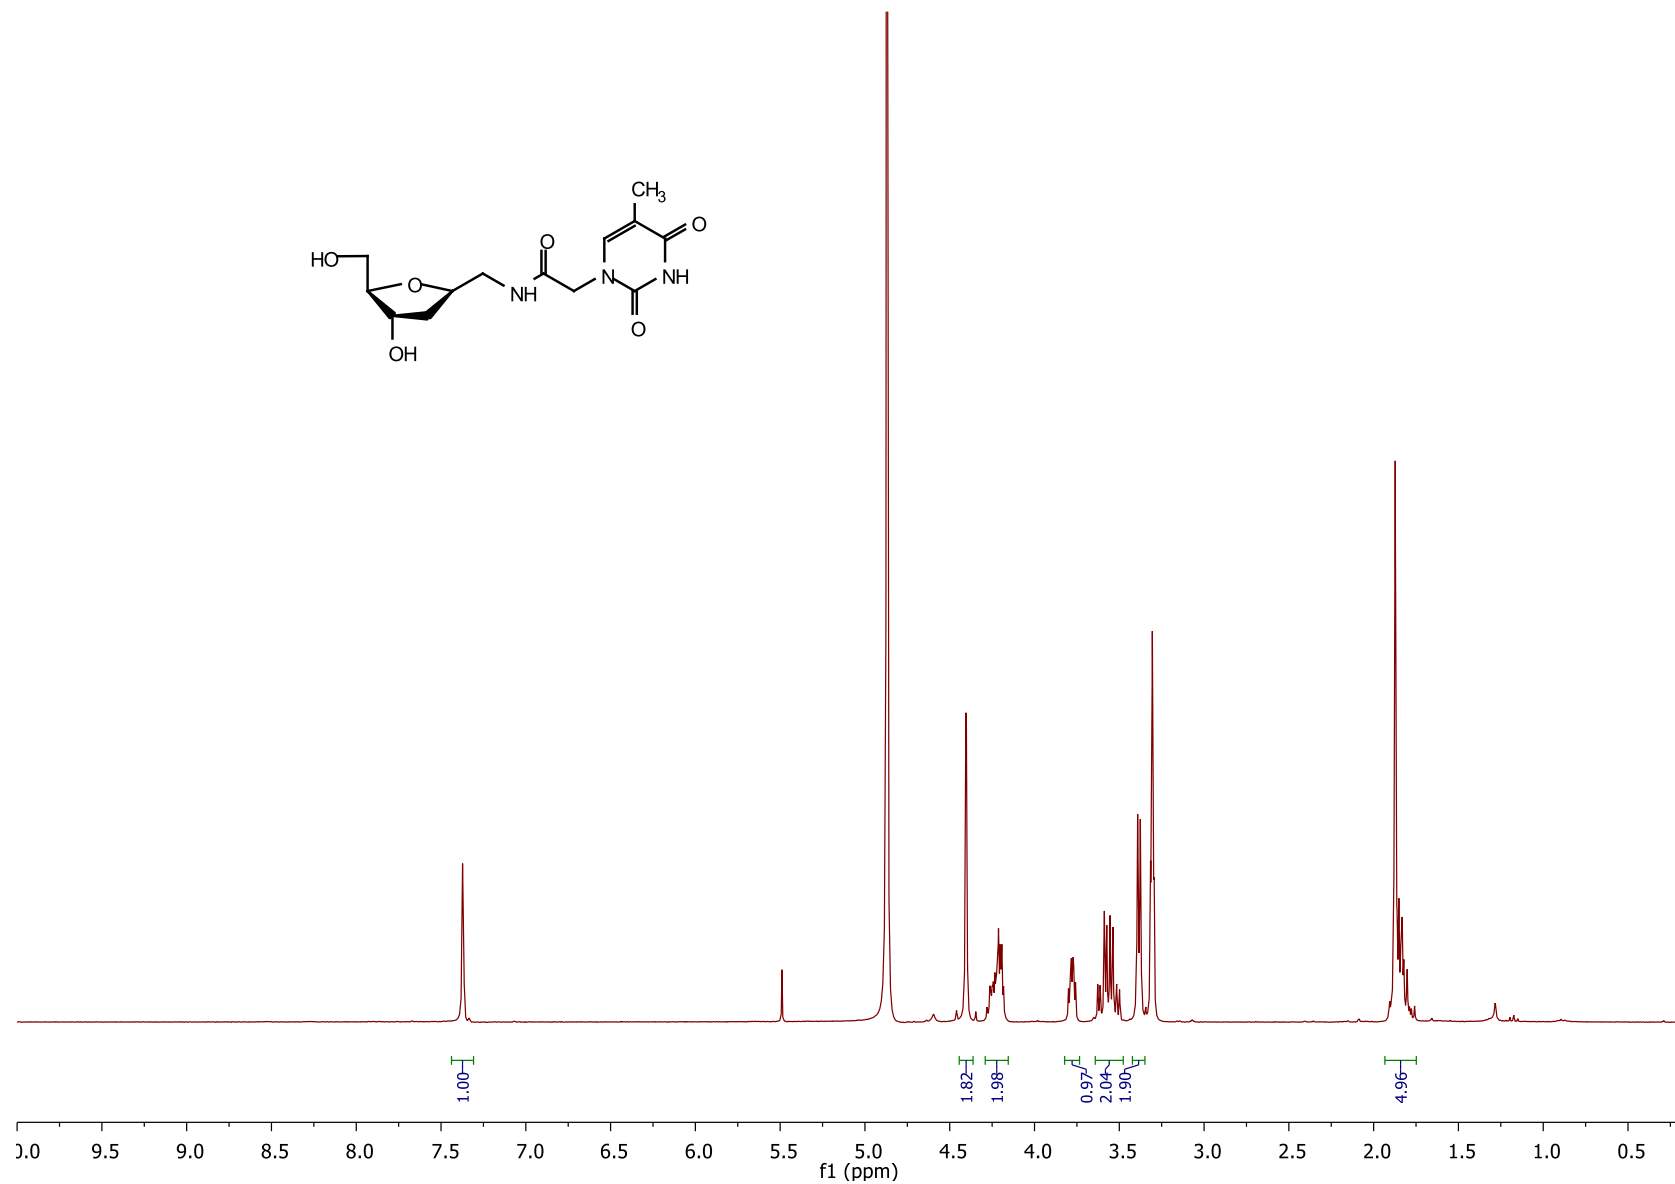

1,2-Dideoxy-1 $\beta$ -[*N*-(1-thyminylacetyl)aminomethyl]-D-ribose (4)

$^{13}\text{C}$  NMR (75.5 MHz, MeOH- $d_4$ )

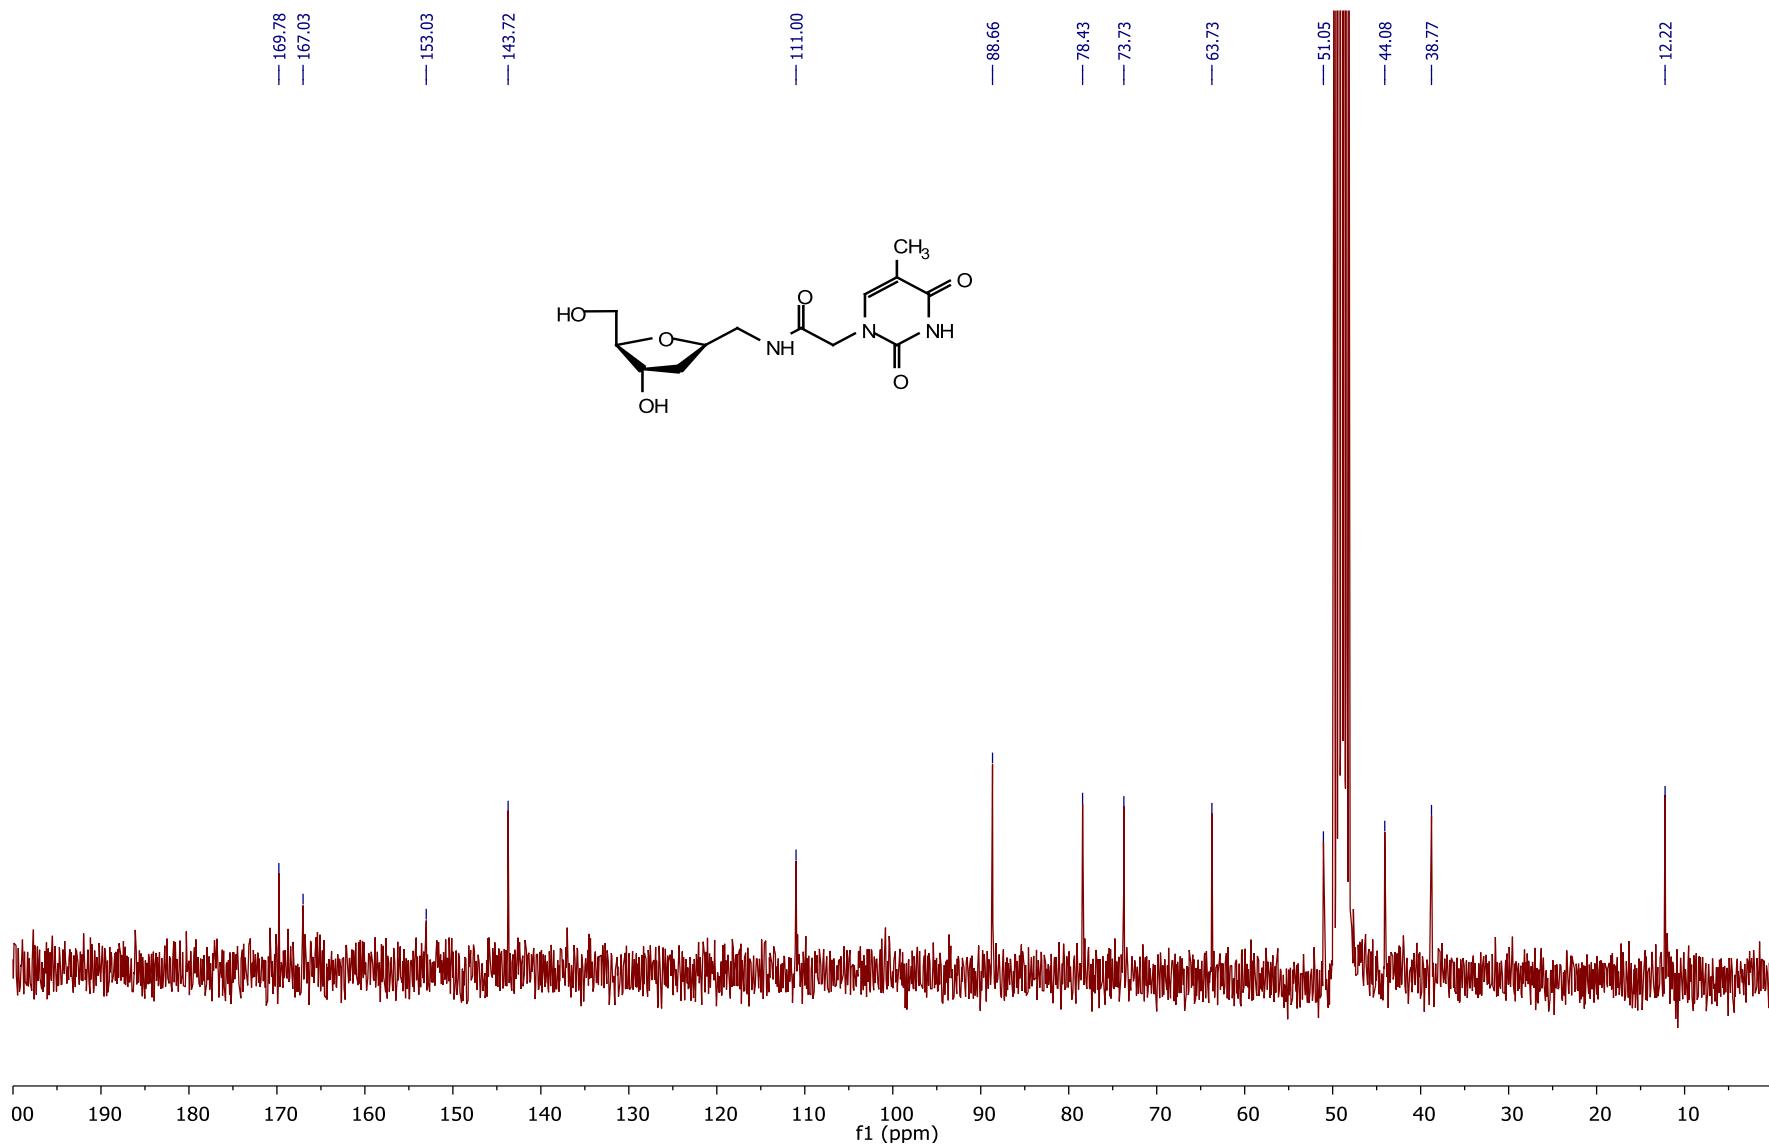

1,2-Dideoxy-1 $\beta$ -[N-(1-thyminylacetyl)aminomethyl]-D-ribose (4)

DEPT NMR (75.5 MHz, MeOH- $d_4$ )

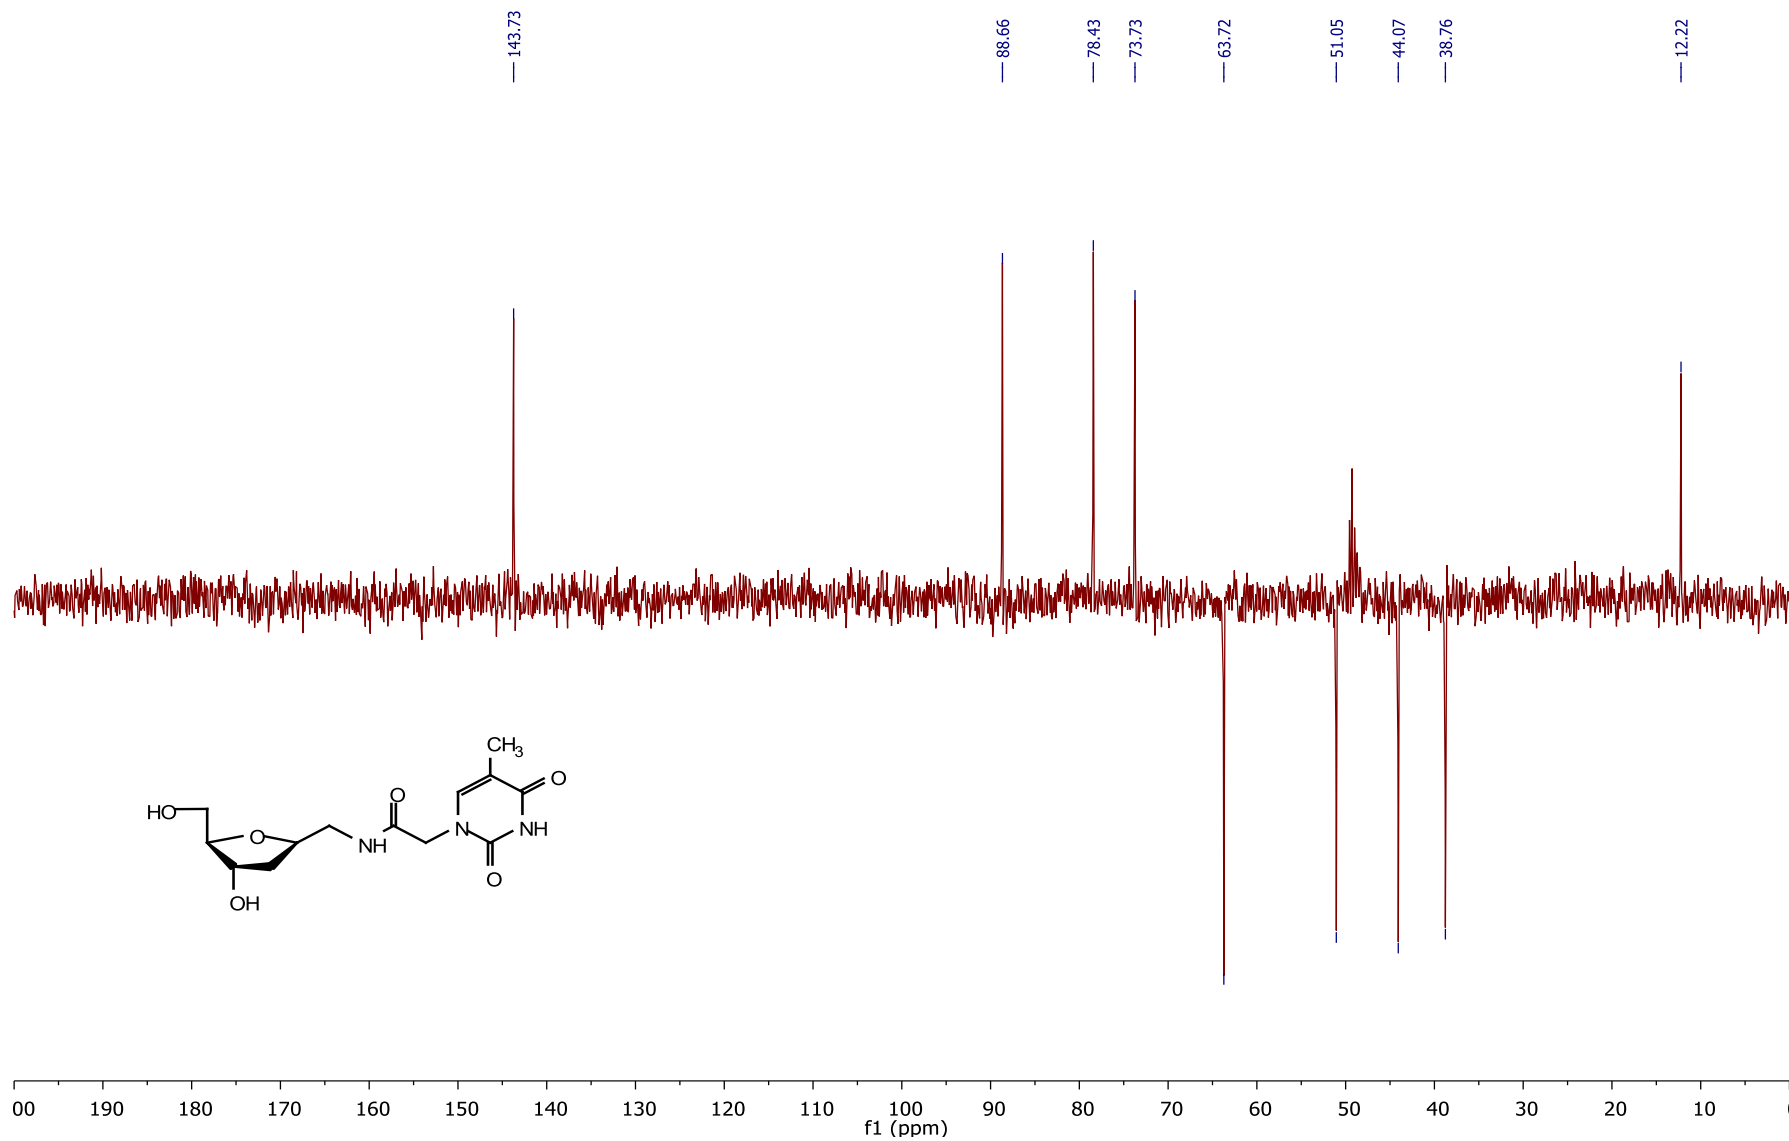



1,2-Dideoxy-1 $\beta$ -[N-(1-thyminylacetyl)aminomethyl]-D-ribose (4)

COSY NMR (MeOH- $d_4$ )

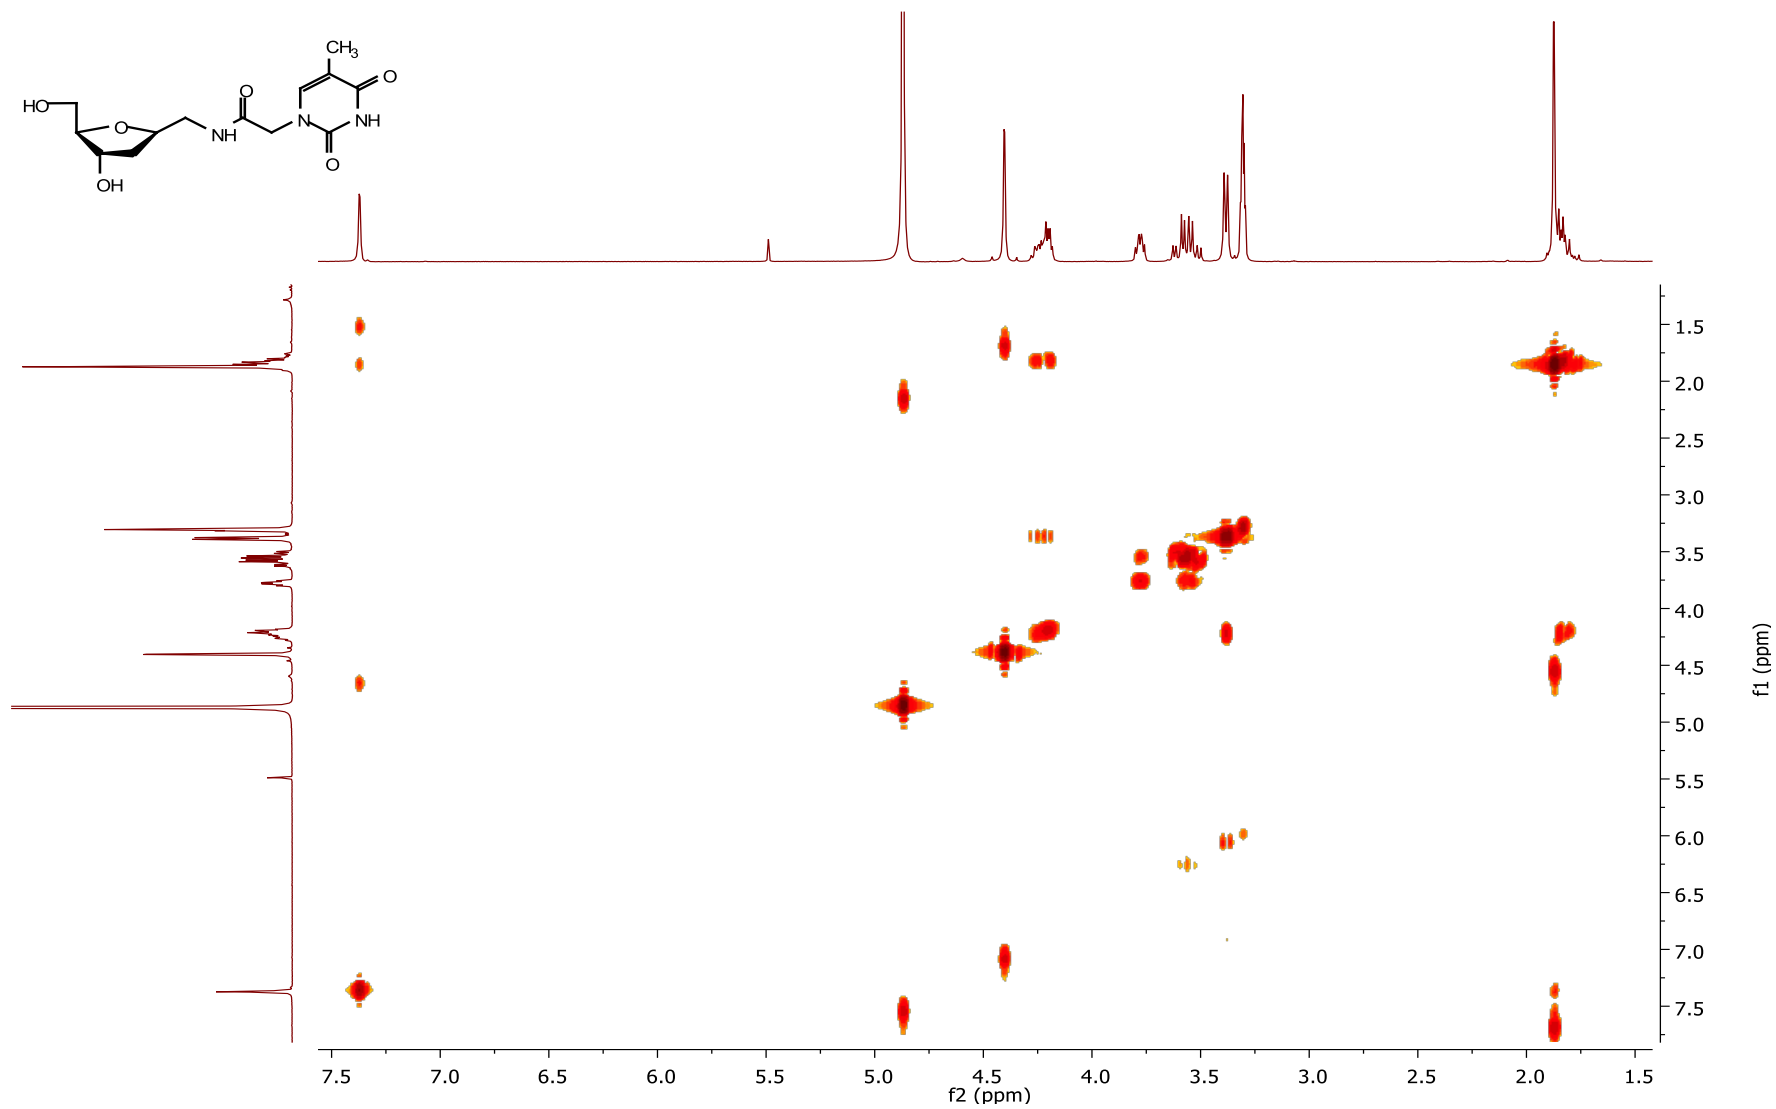

1,2-Dideoxy-1 $\beta$ -[N-(1-thyminylacetyl)aminomethyl]-D-ribose (4)

HSQC NMR (MeOH- $d_4$ )

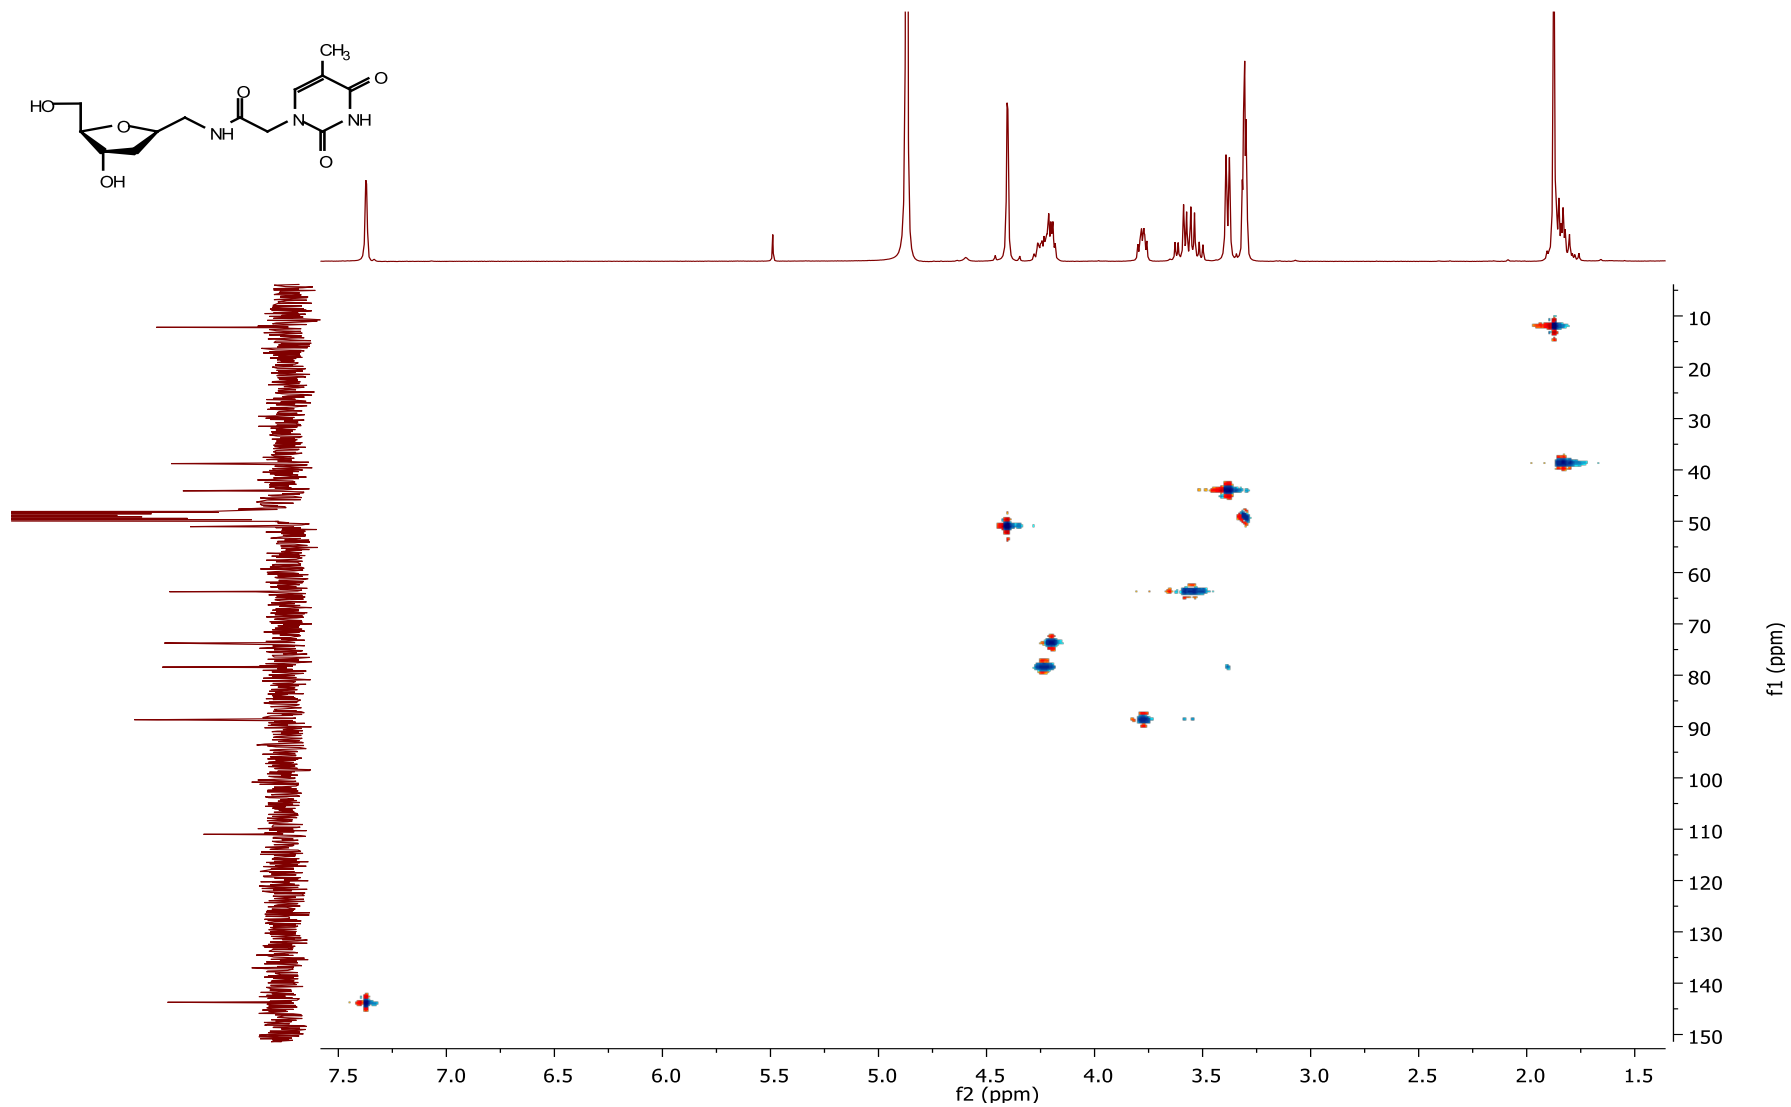

1,2-Dideoxy-1 $\beta$ -[N-(1-thyminylacetyl)aminomethyl]-D-ribose (4)

HMBC NMR (MeOH- $d_4$ )

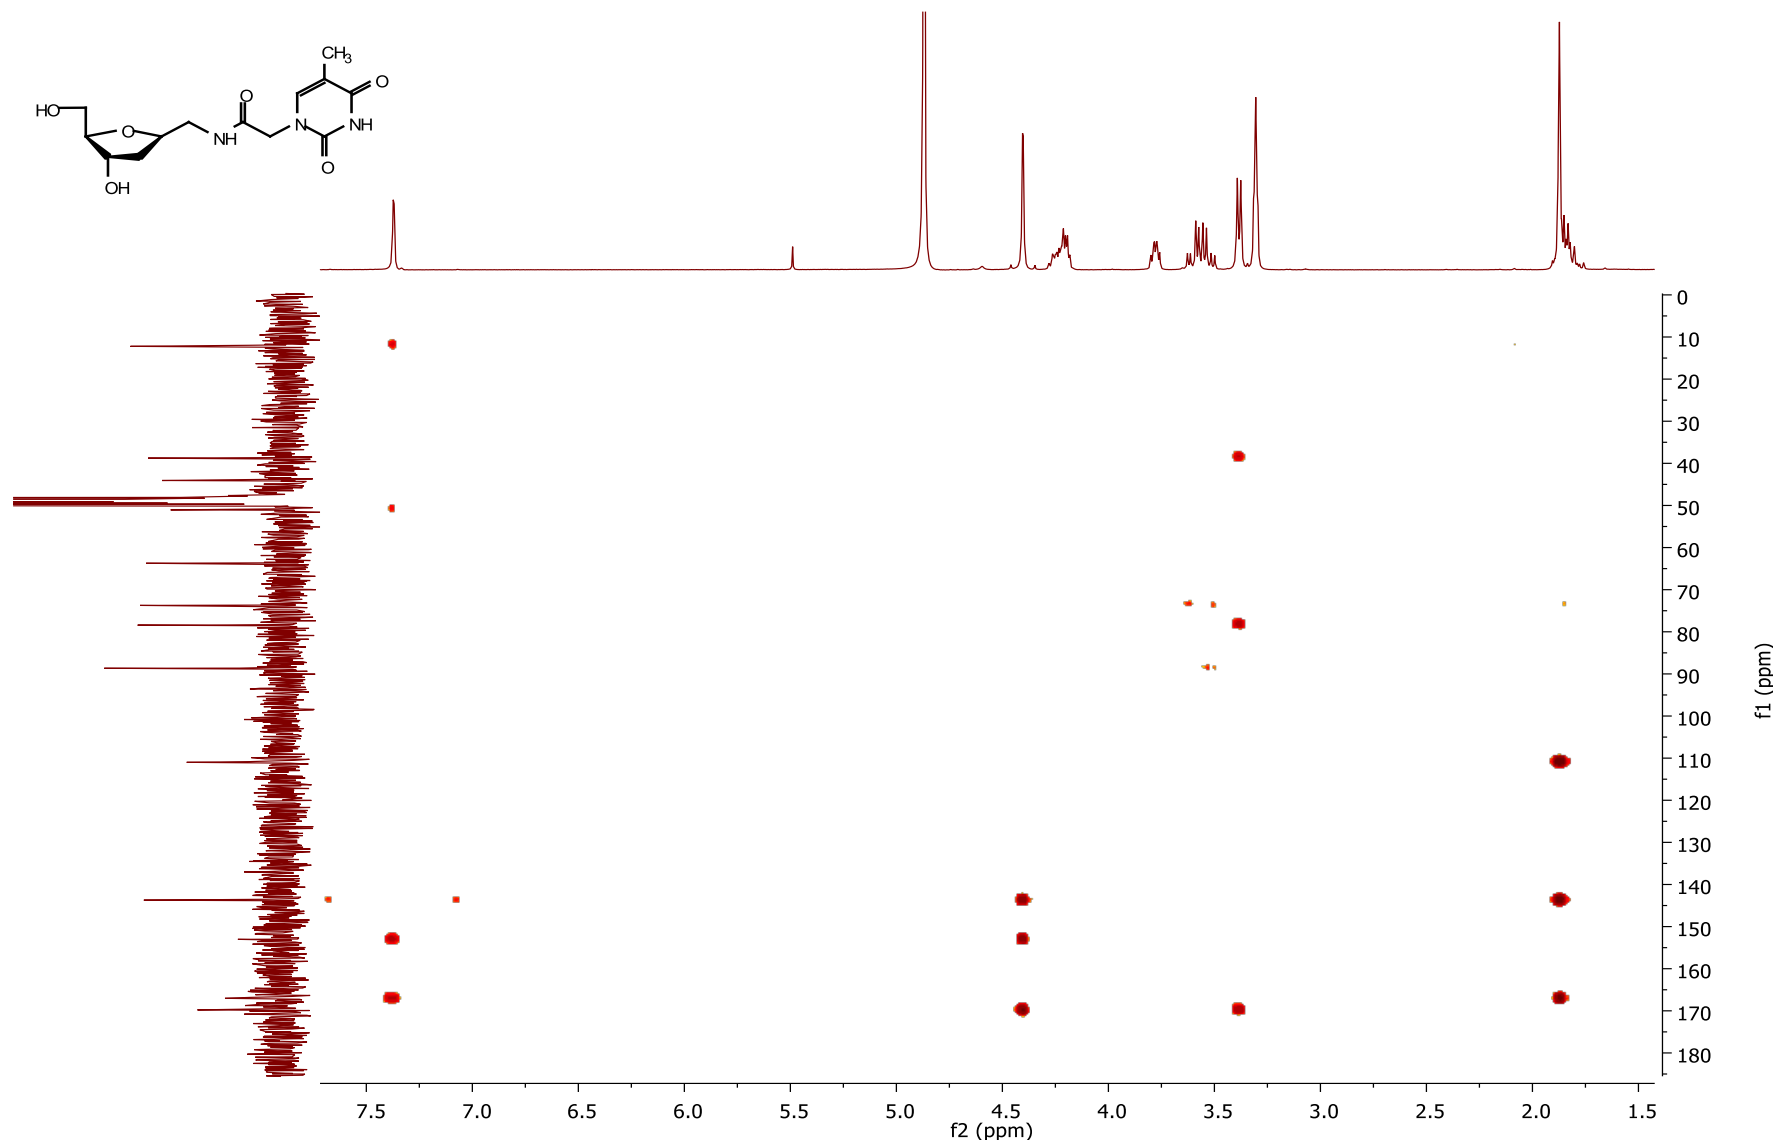

1,2-Dideoxy-5-O-(4,4'-dimethoxytrityl)-1-[N-(1-thyminylacetyl)aminomethyl]-D-ribose (5, DMT-T\*)

<sup>1</sup>H NMR (300.13 MHz, MeOH-d<sub>4</sub>)

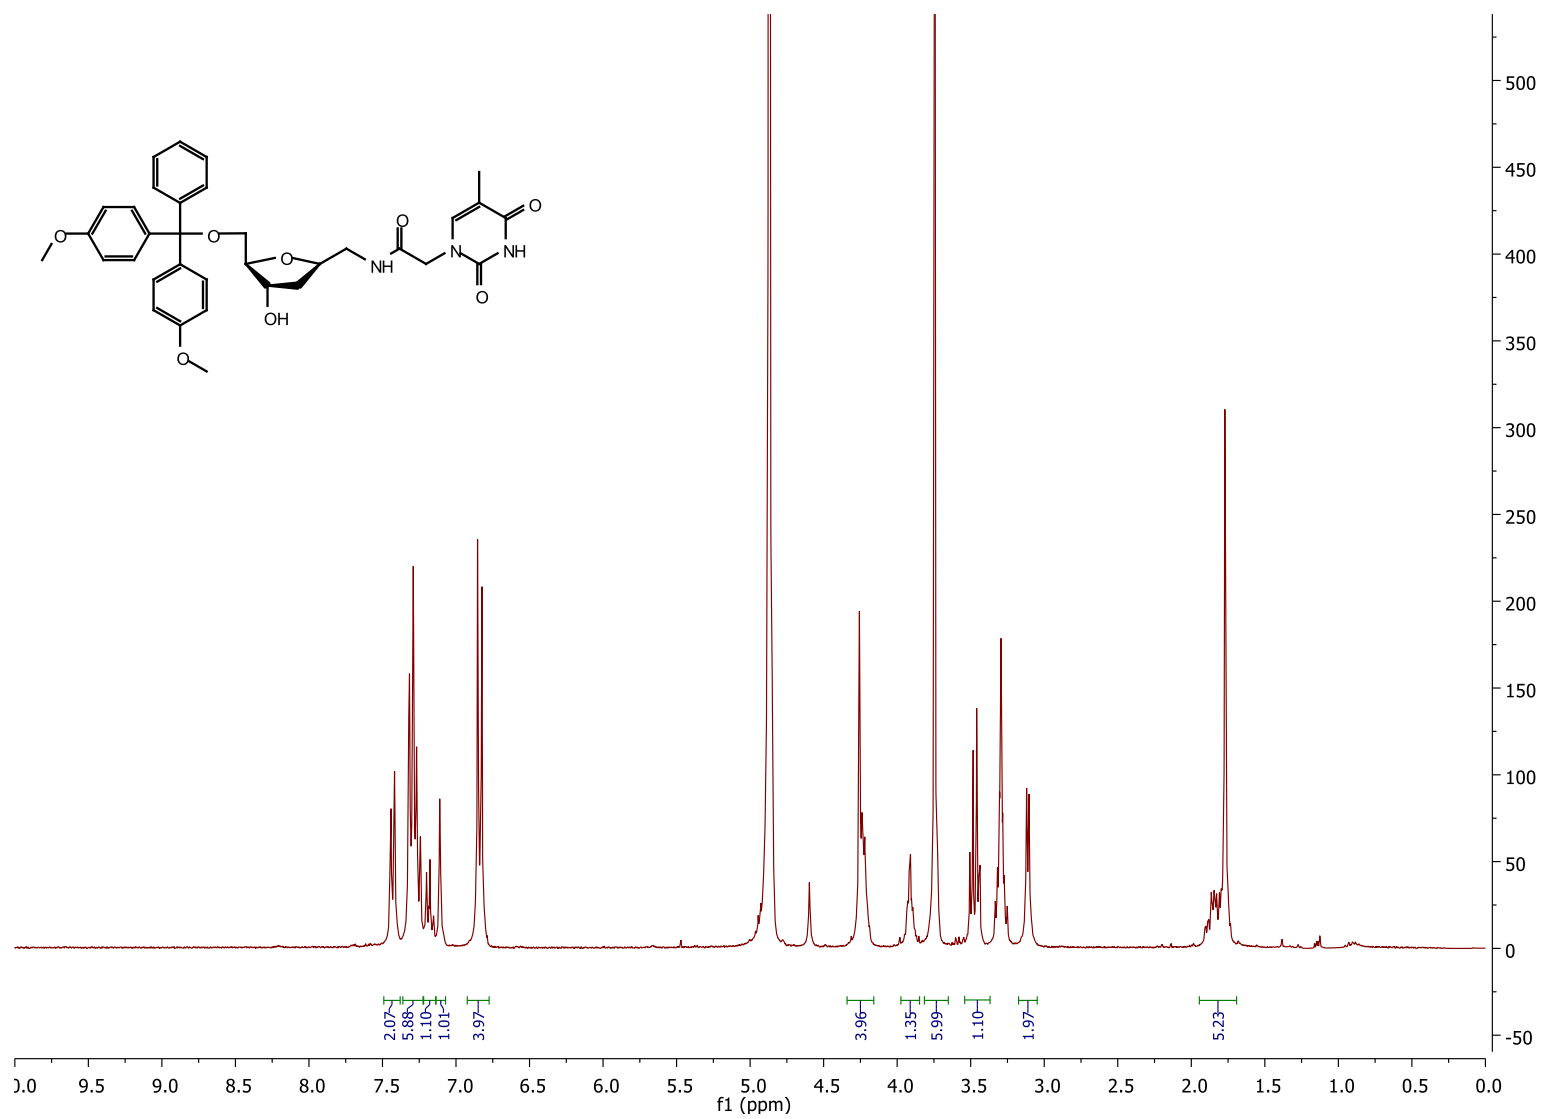

1,2-Dideoxy-5-O-(4,4'-dimethoxytrityl)-1-[N-(1-thyminylacetyl)aminomethyl]-D-ribose (5, DMT-T\*)

<sup>13</sup>C NMR (75.5 MHz, MeOH-d<sub>4</sub>)

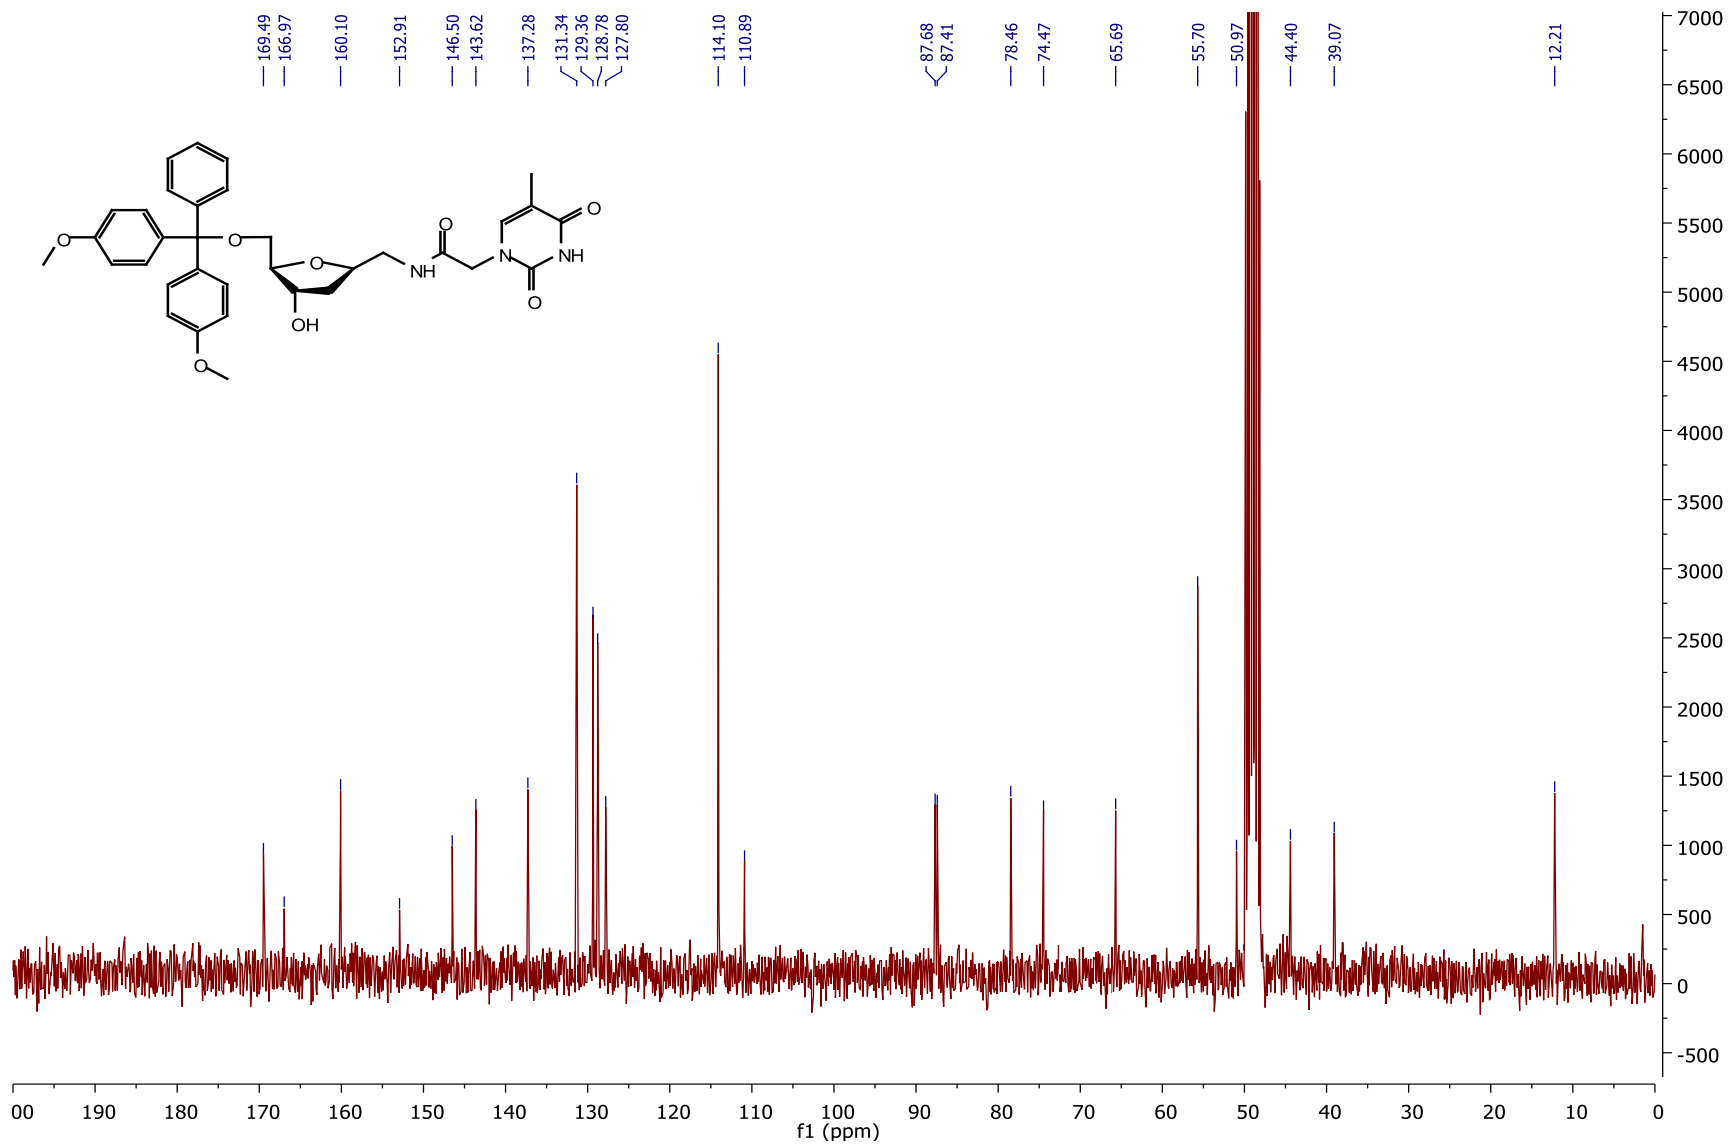

1,2-Dideoxy-5-O-(4,4'-dimethoxytrityl)-1-[N-(1-thyminylacetyl)aminomethyl]-D-ribose (5, DMT-T\*)

DEPT NMR (75.5 MHz, MeOH-*d*<sub>4</sub>)

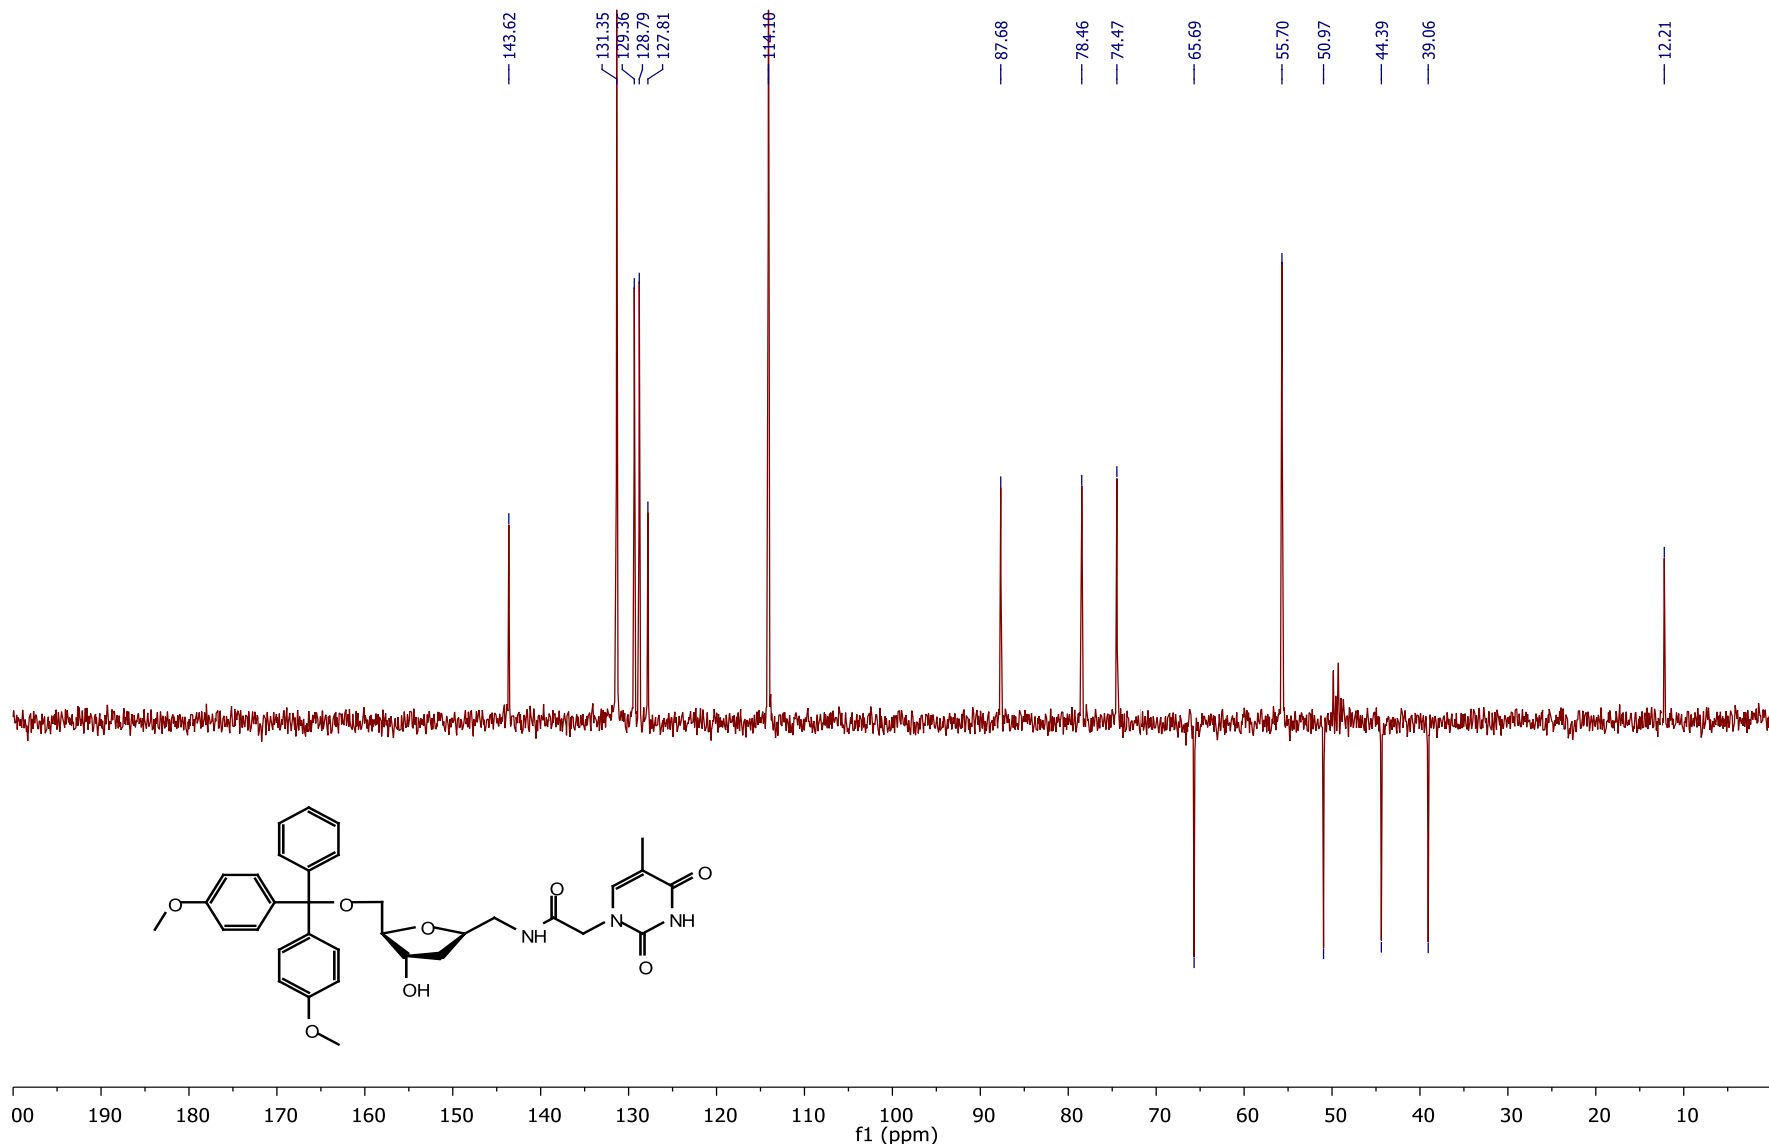

1,2-Dideoxy-5-*O*-(4,4'-dimethoxytrityl)-1-[*N*-(1-thyminylacetyl)aminomethyl]-D-ribose (5, DMT-T\*)

COSY NMR (MeOH-*d*<sub>4</sub>)

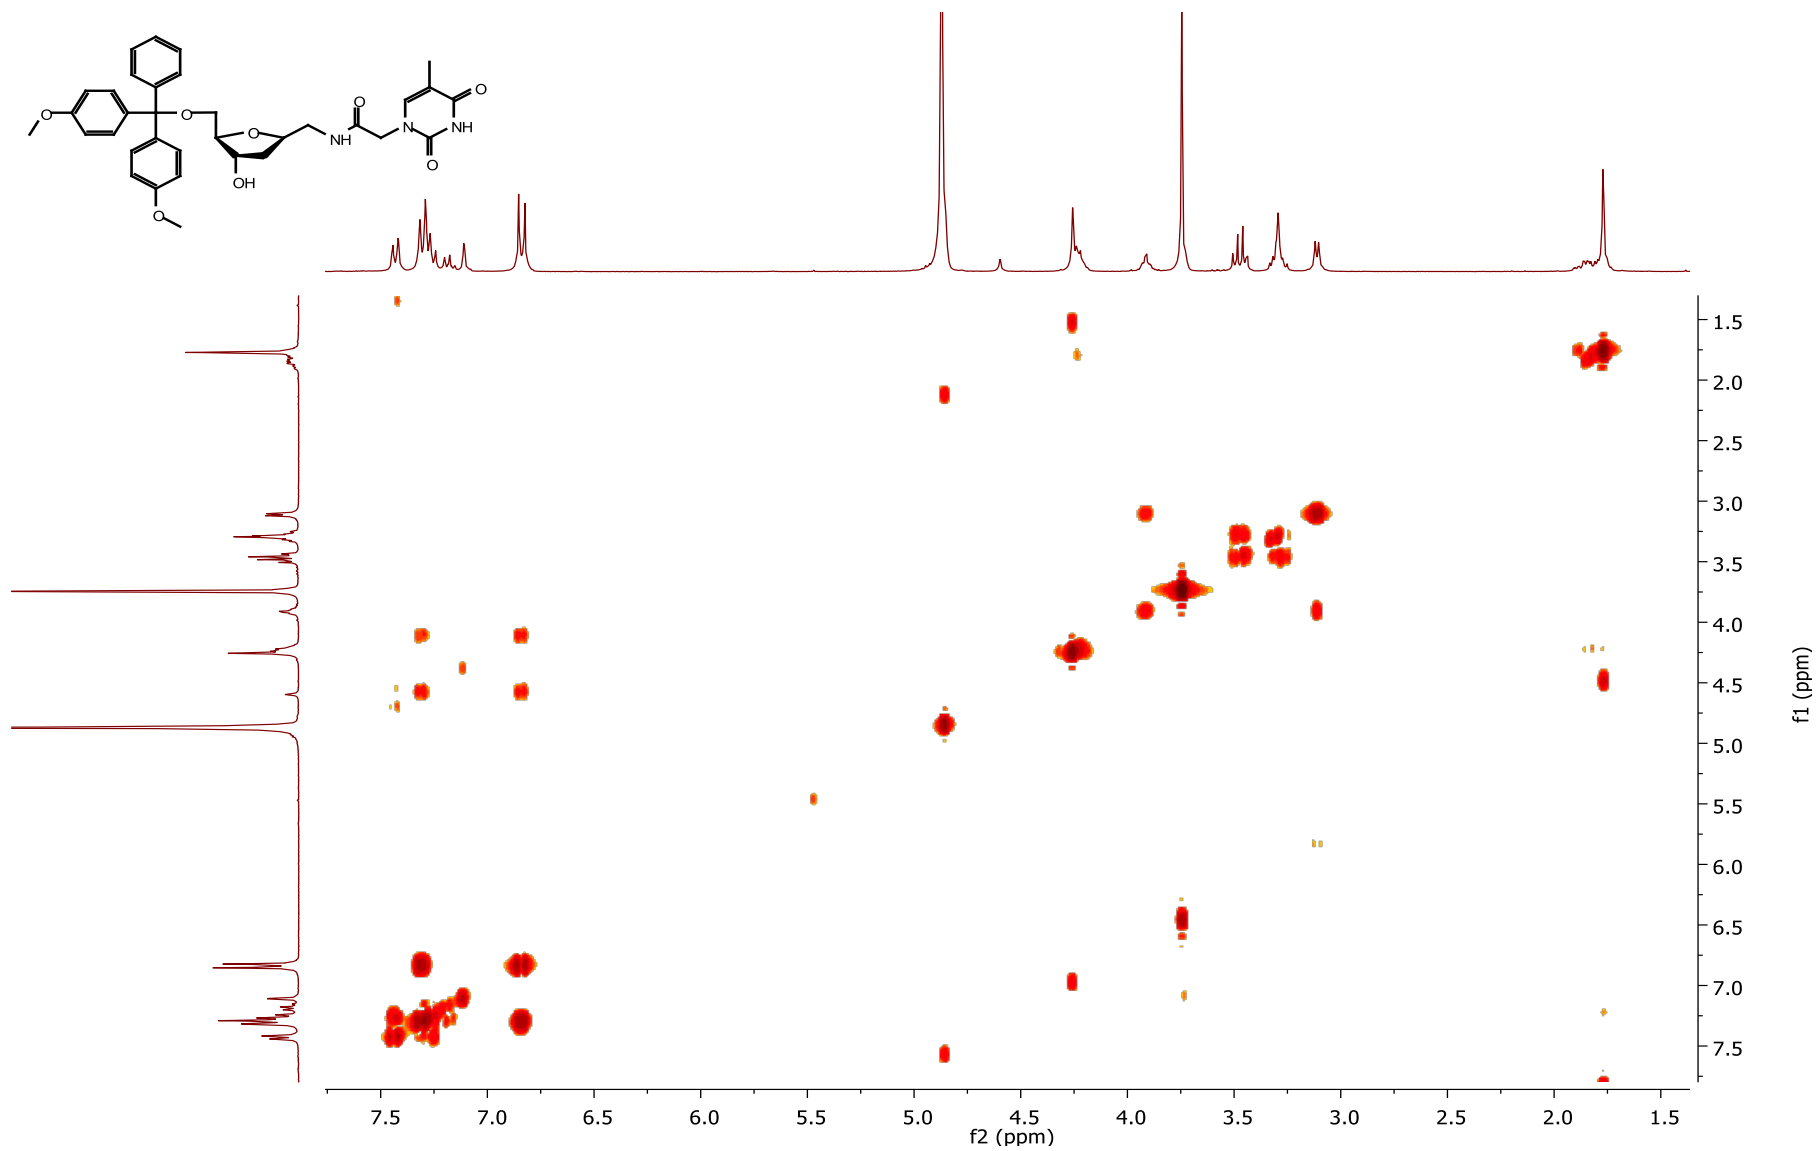

1,2-Dideoxy-5-*O*-(4,4'-dimethoxytrityl)-1-[*N*-(1-thyminylacetyl)aminomethyl]-D-ribose (5, DMT-T\*)

HSQC NMR (MeOH-*d*<sub>4</sub>)

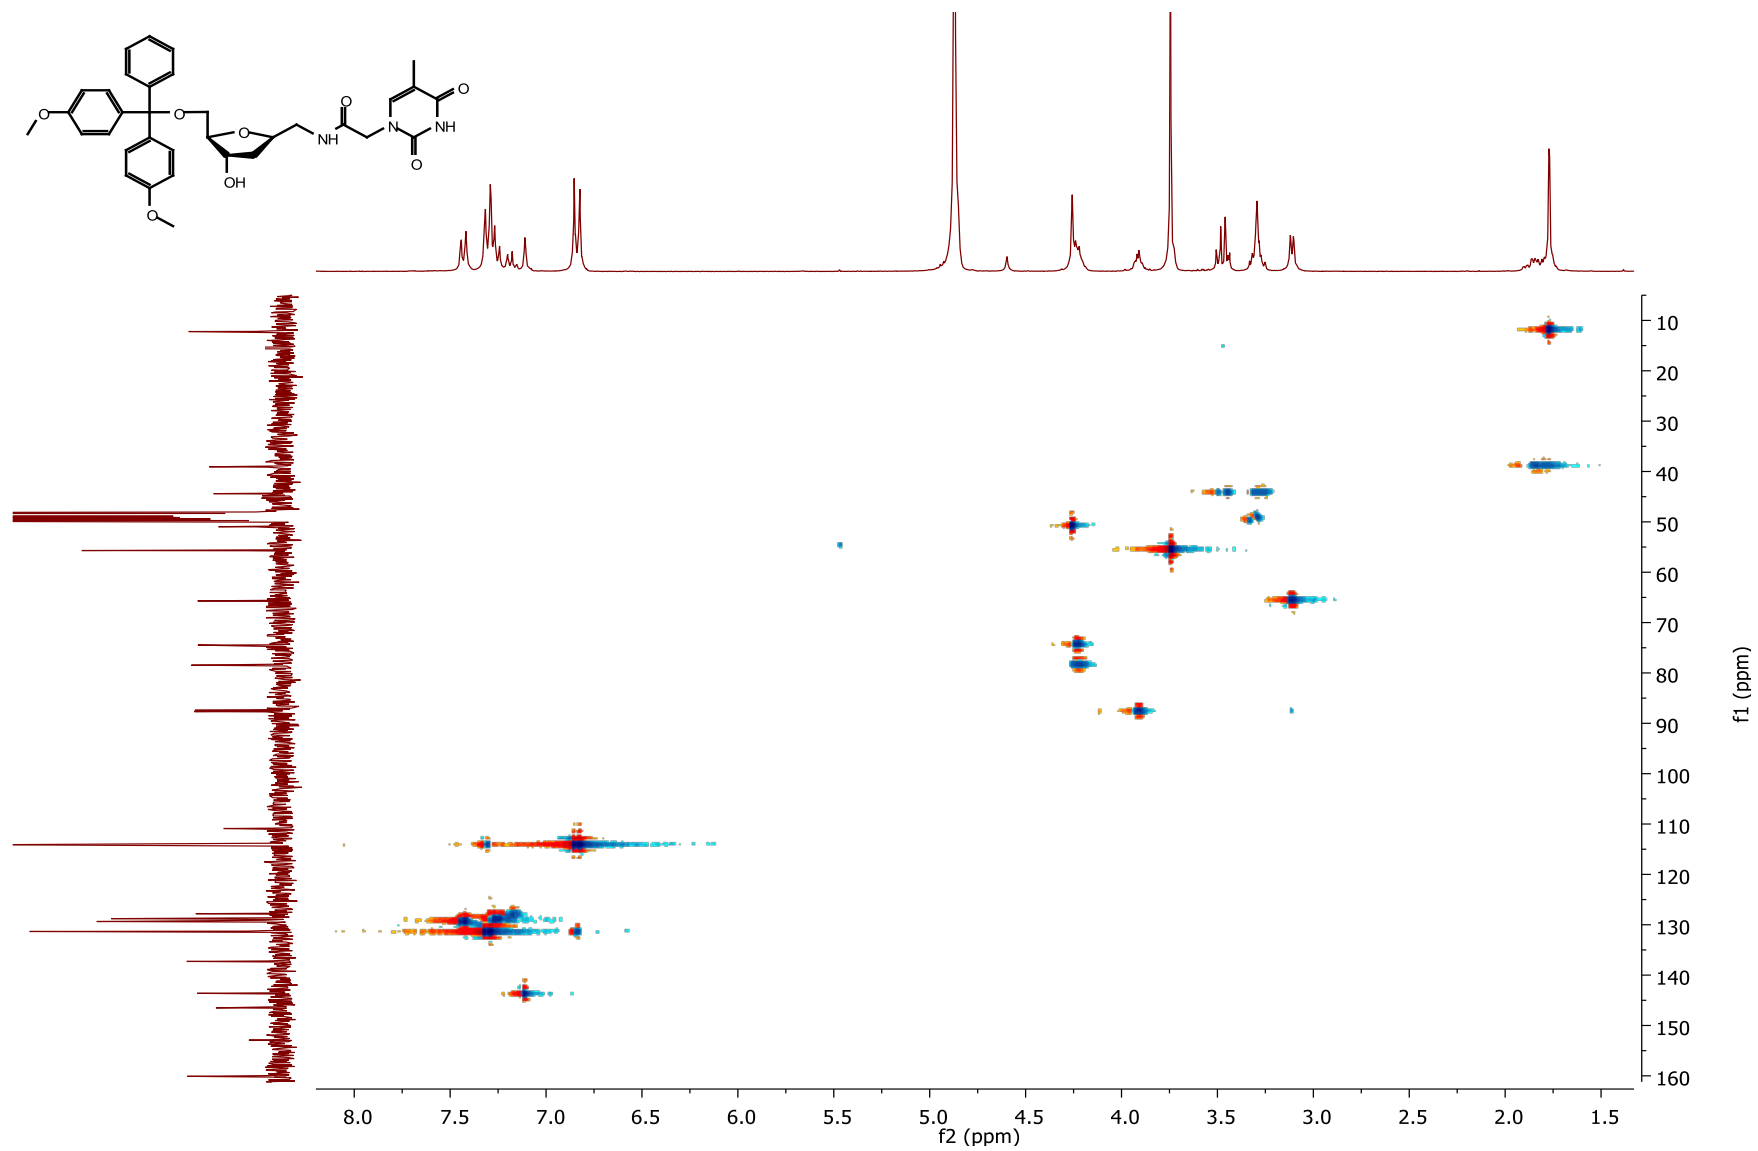



1,2-Dideoxy-5-*O*-(4,4'-dimethoxytrityl)-1-[*N*-(1-thyminylacetyl)aminomethyl]-D-ribose (5, DMT-T\*)

HMBC NMR (MeOH-*d*<sub>4</sub>)

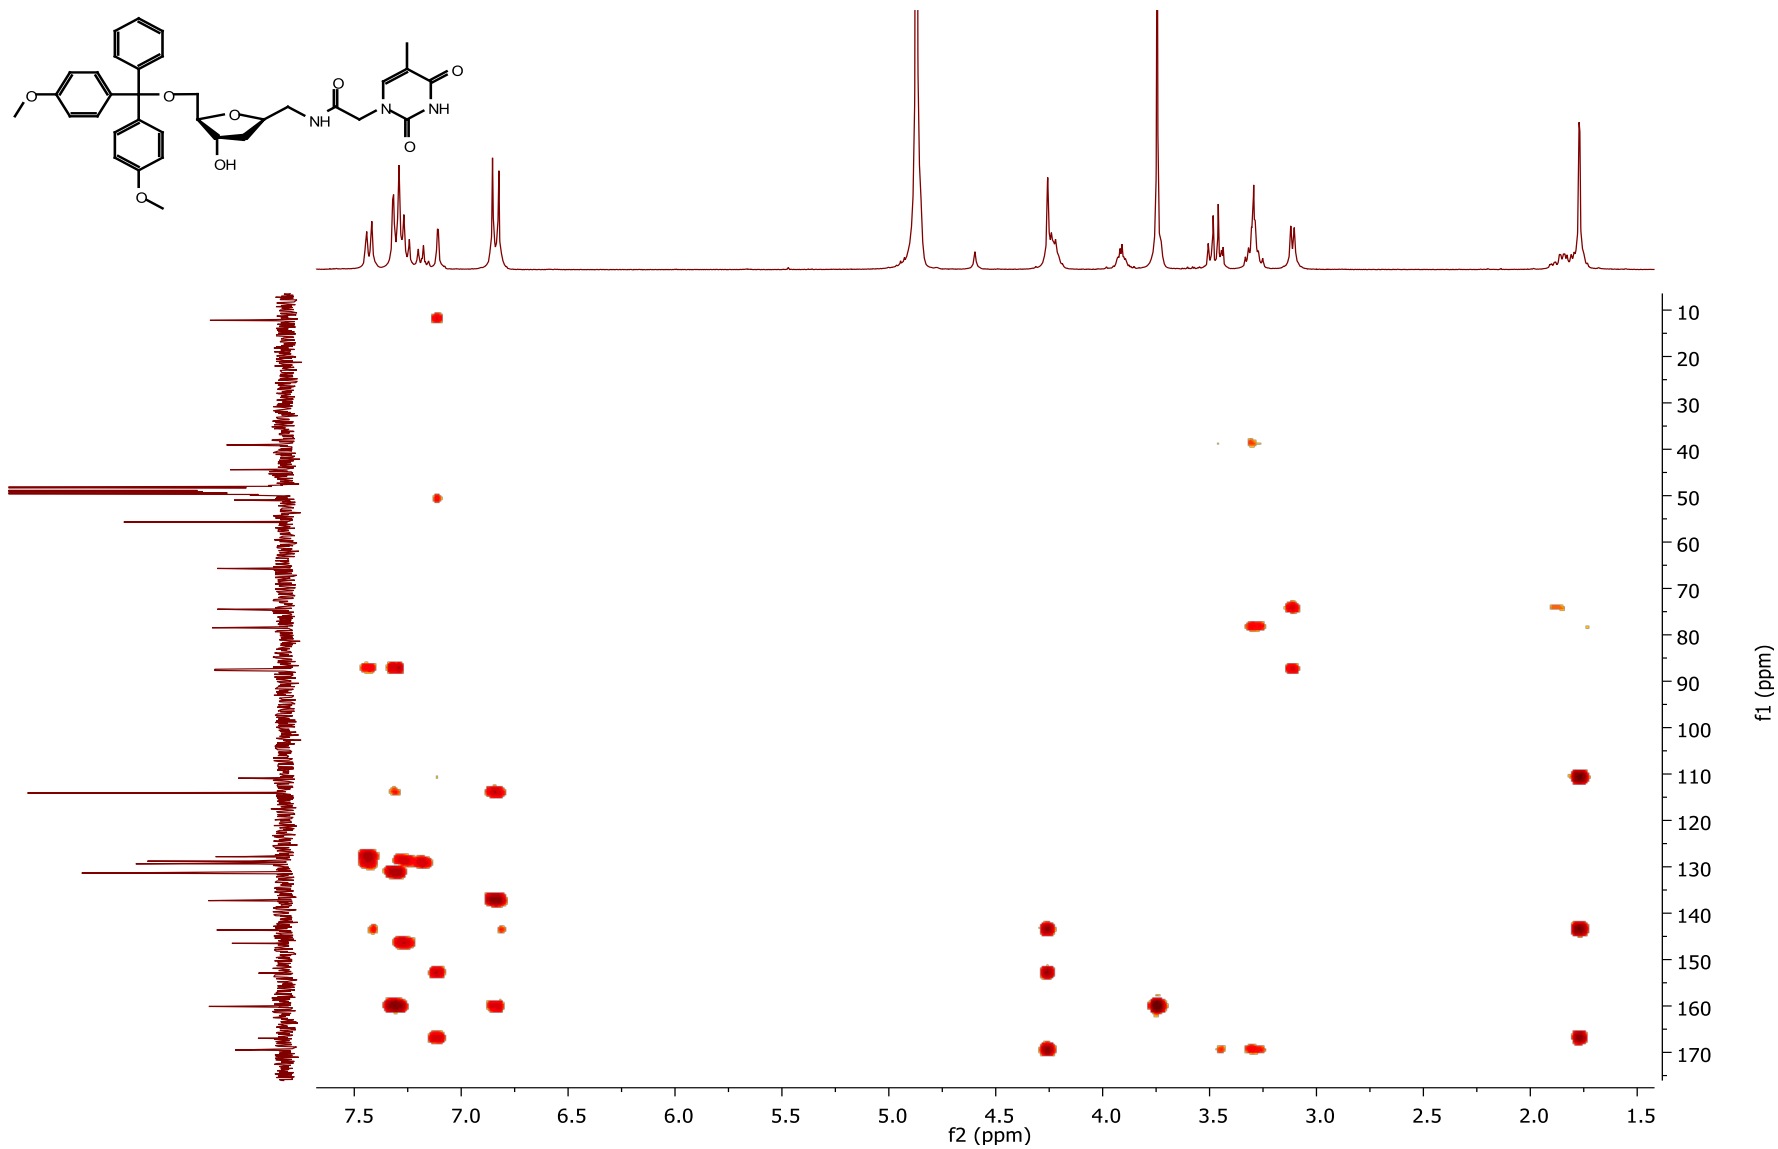

DMT-T\* phosphoramidite derivative (6)

$^{31}\text{P}$  NMR ( $\text{CDCl}_3$ )

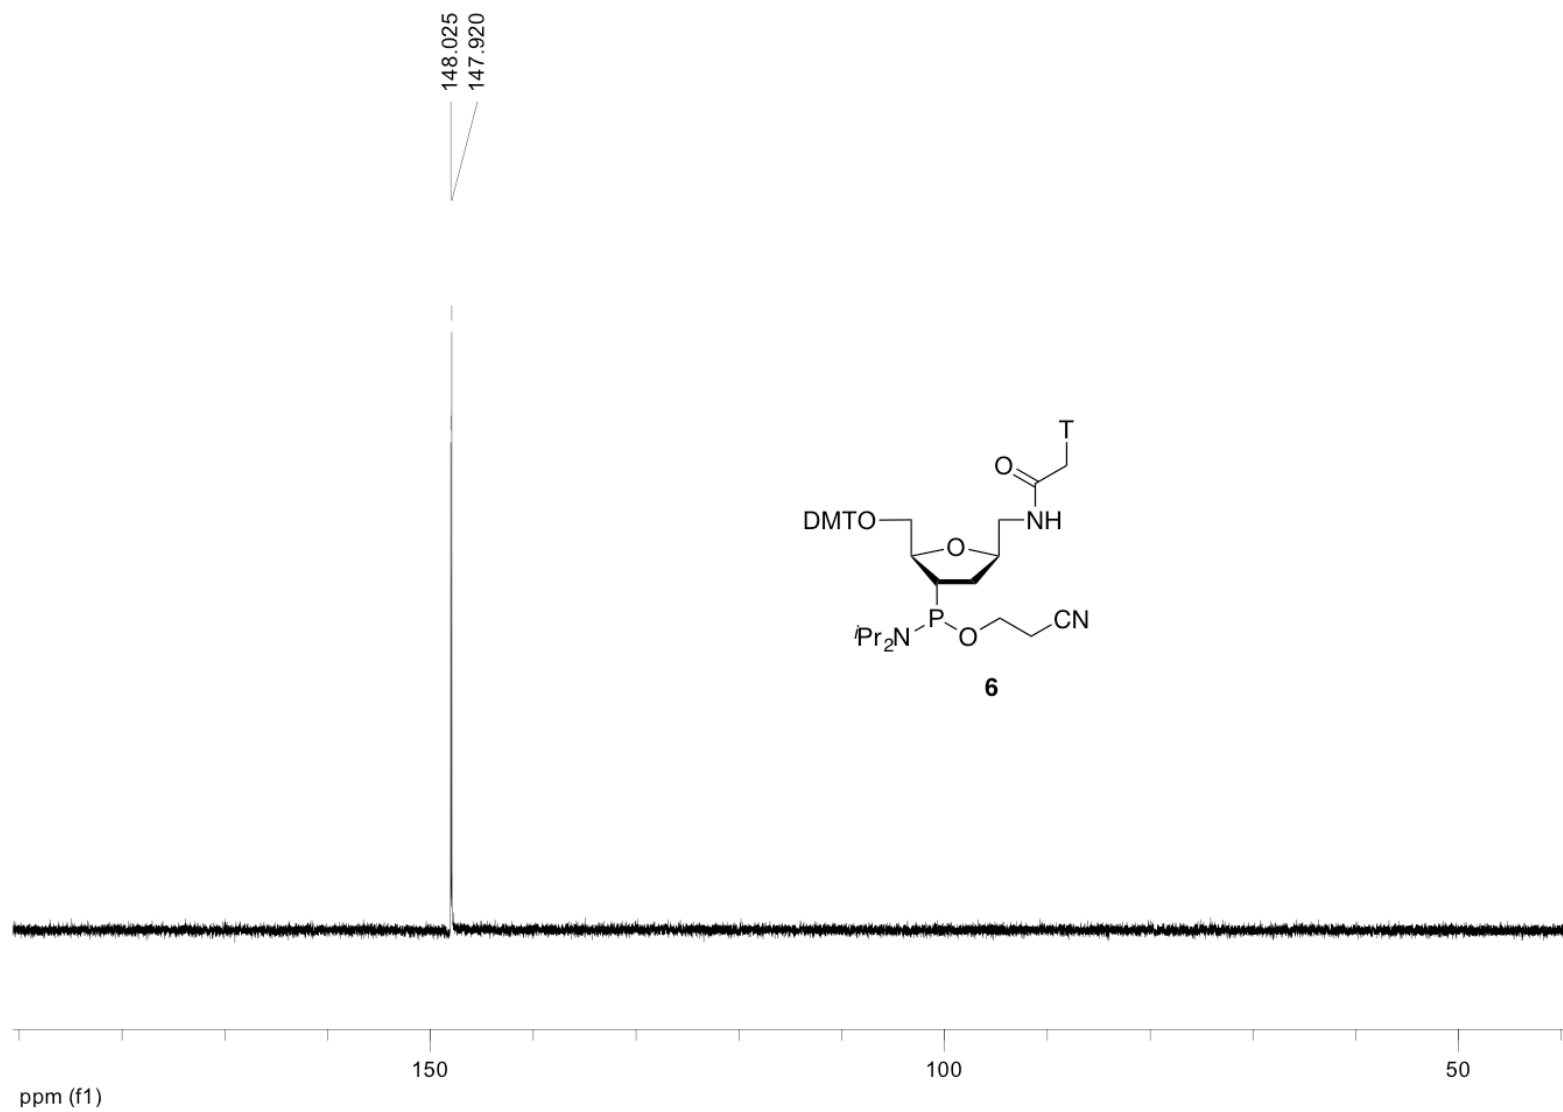

15Mer\_T\*(01)

MALDI-TOF

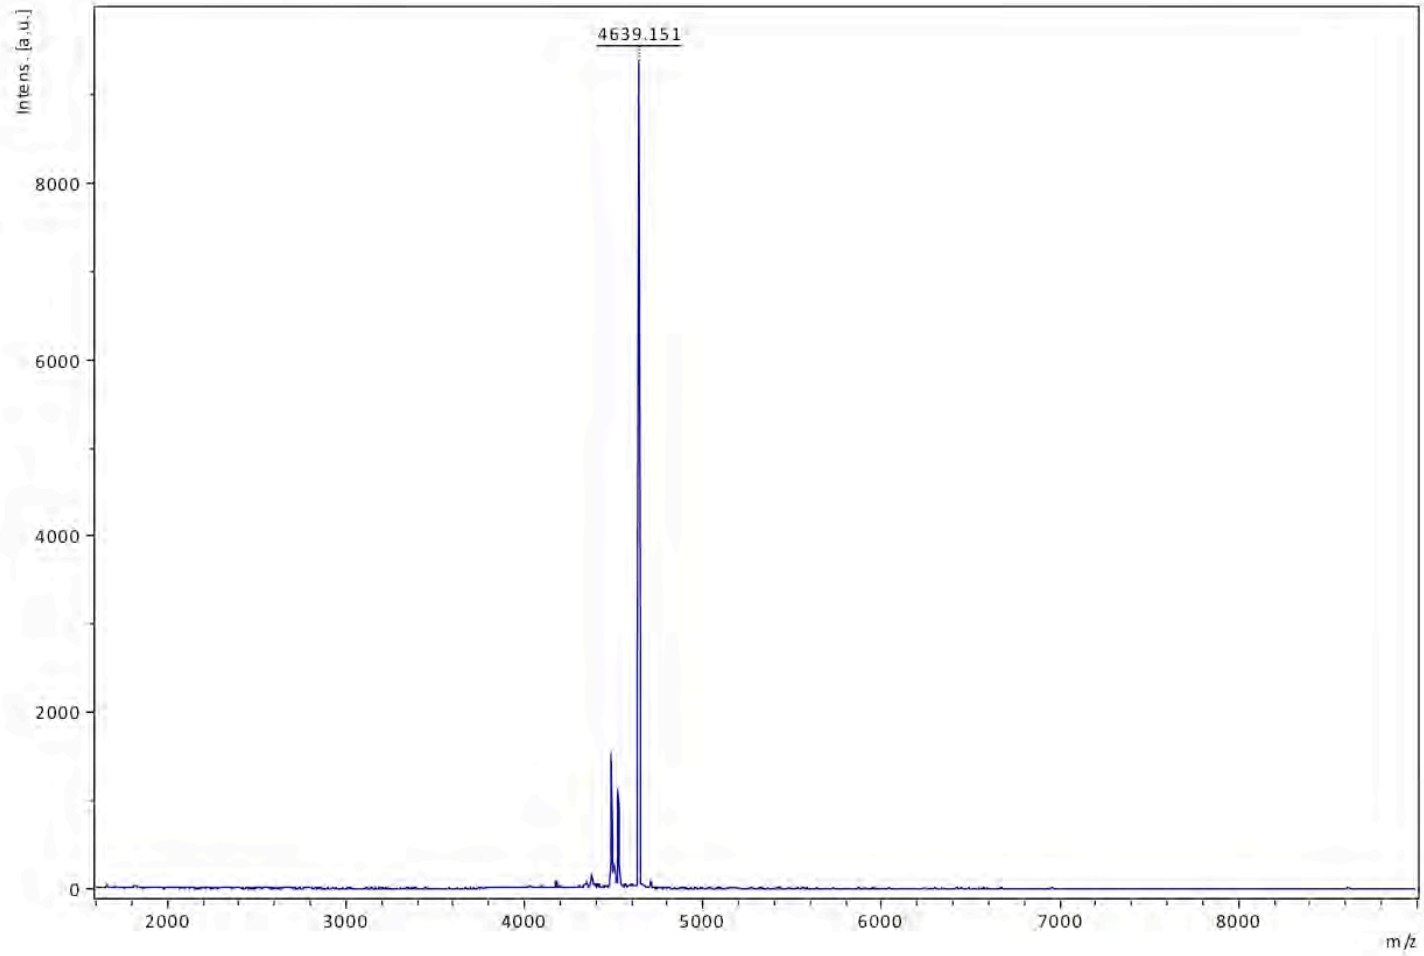

15Mer\_T\*(02)

MALDI-TOF

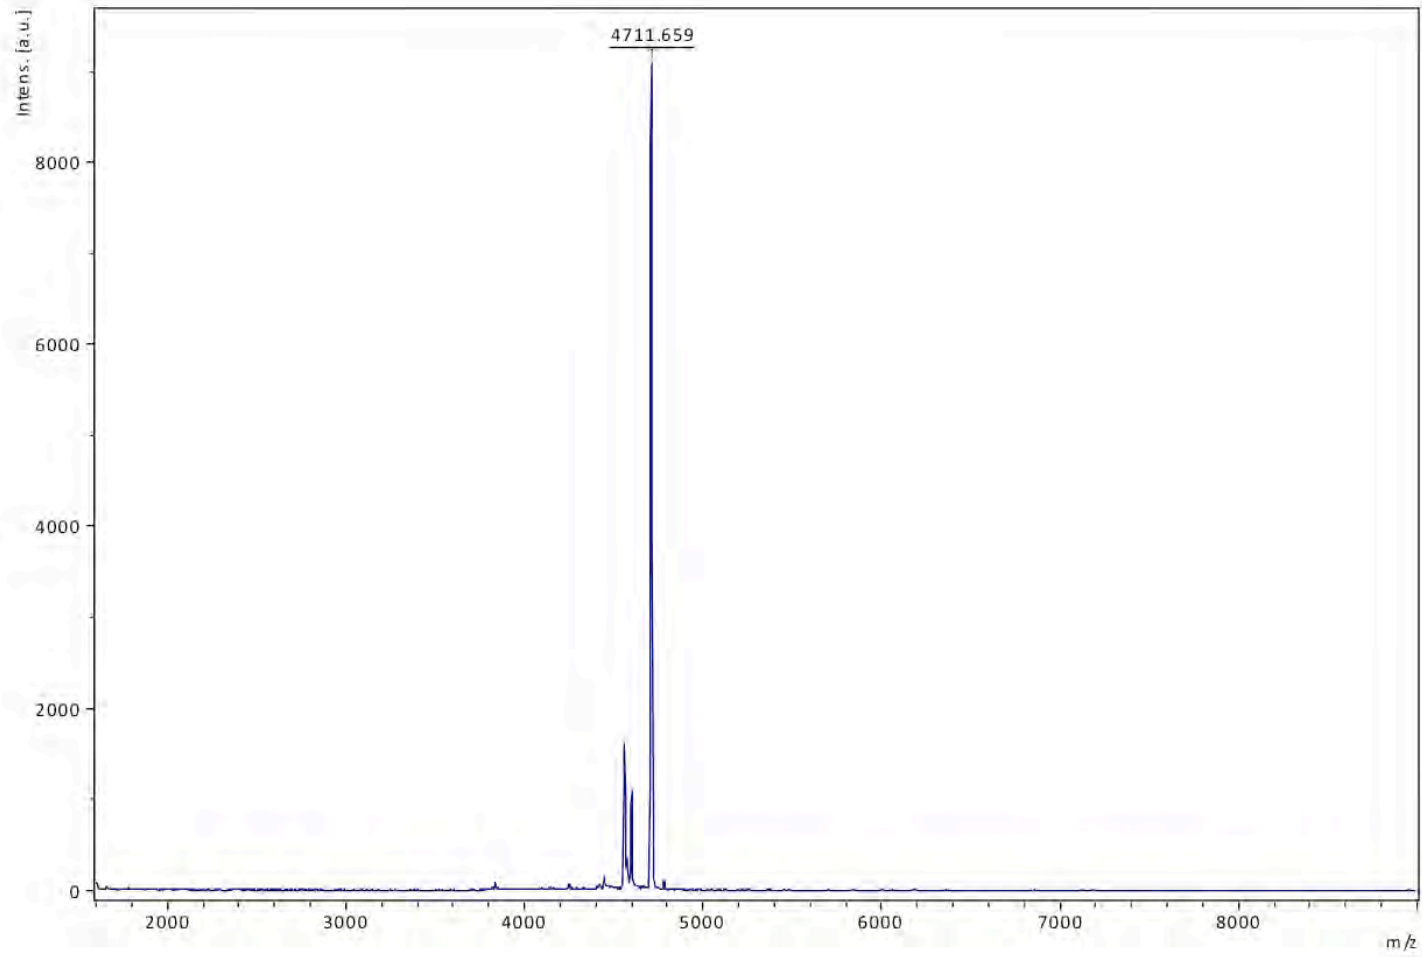

15Mer\_T\*(03)

MALDI-TOF

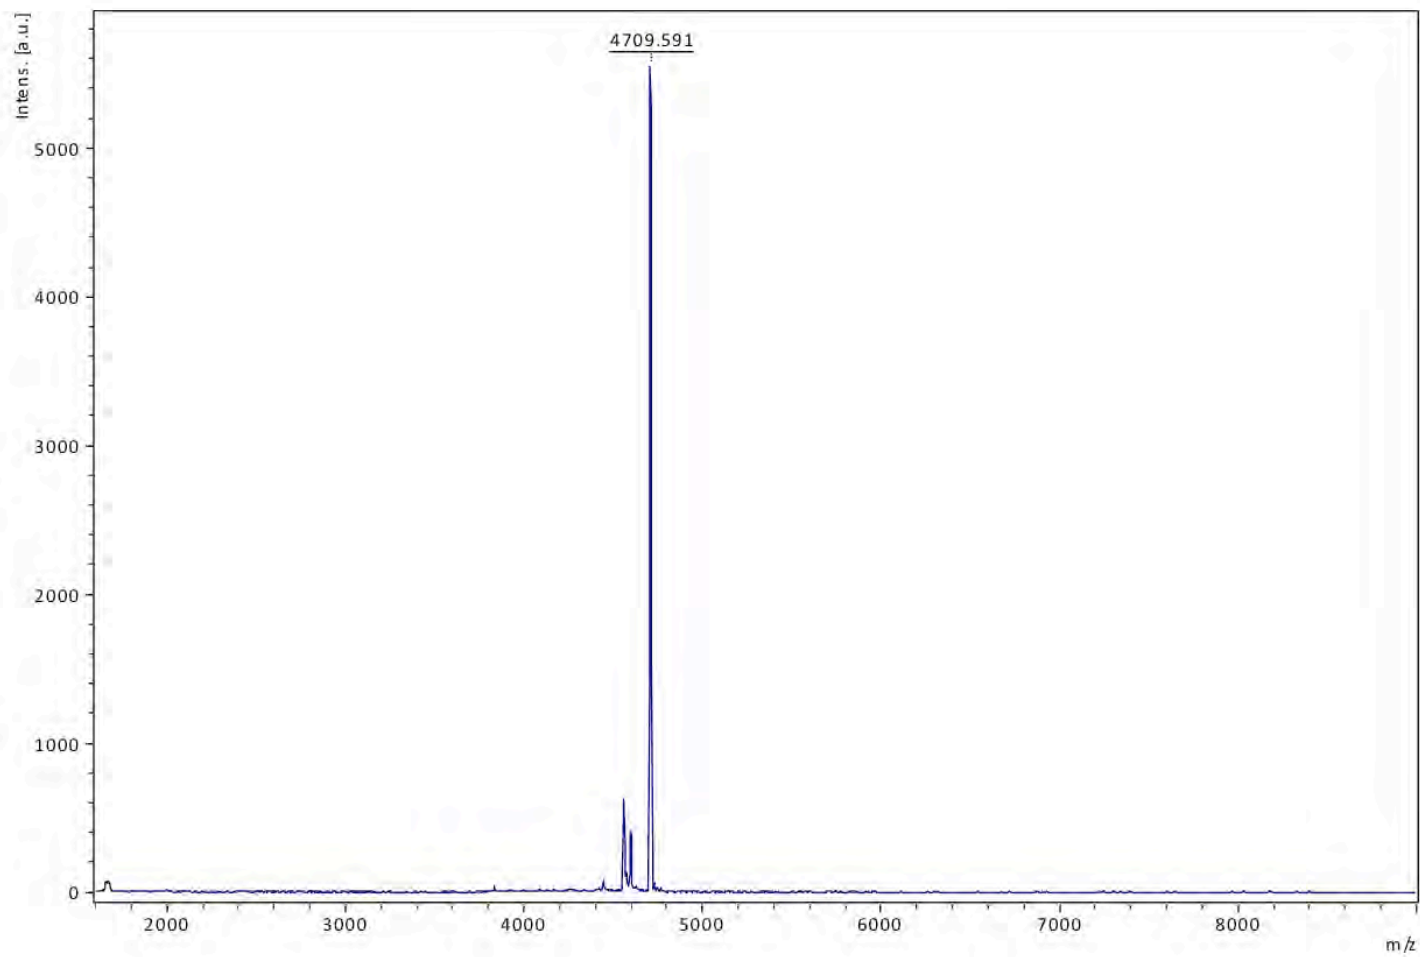

ASmd

MALDI-TOF

Applied Biosystems 4700 Proteomics Analyzer 2011

4700 Linear Spec #1[BP = 6580.4, 1702]

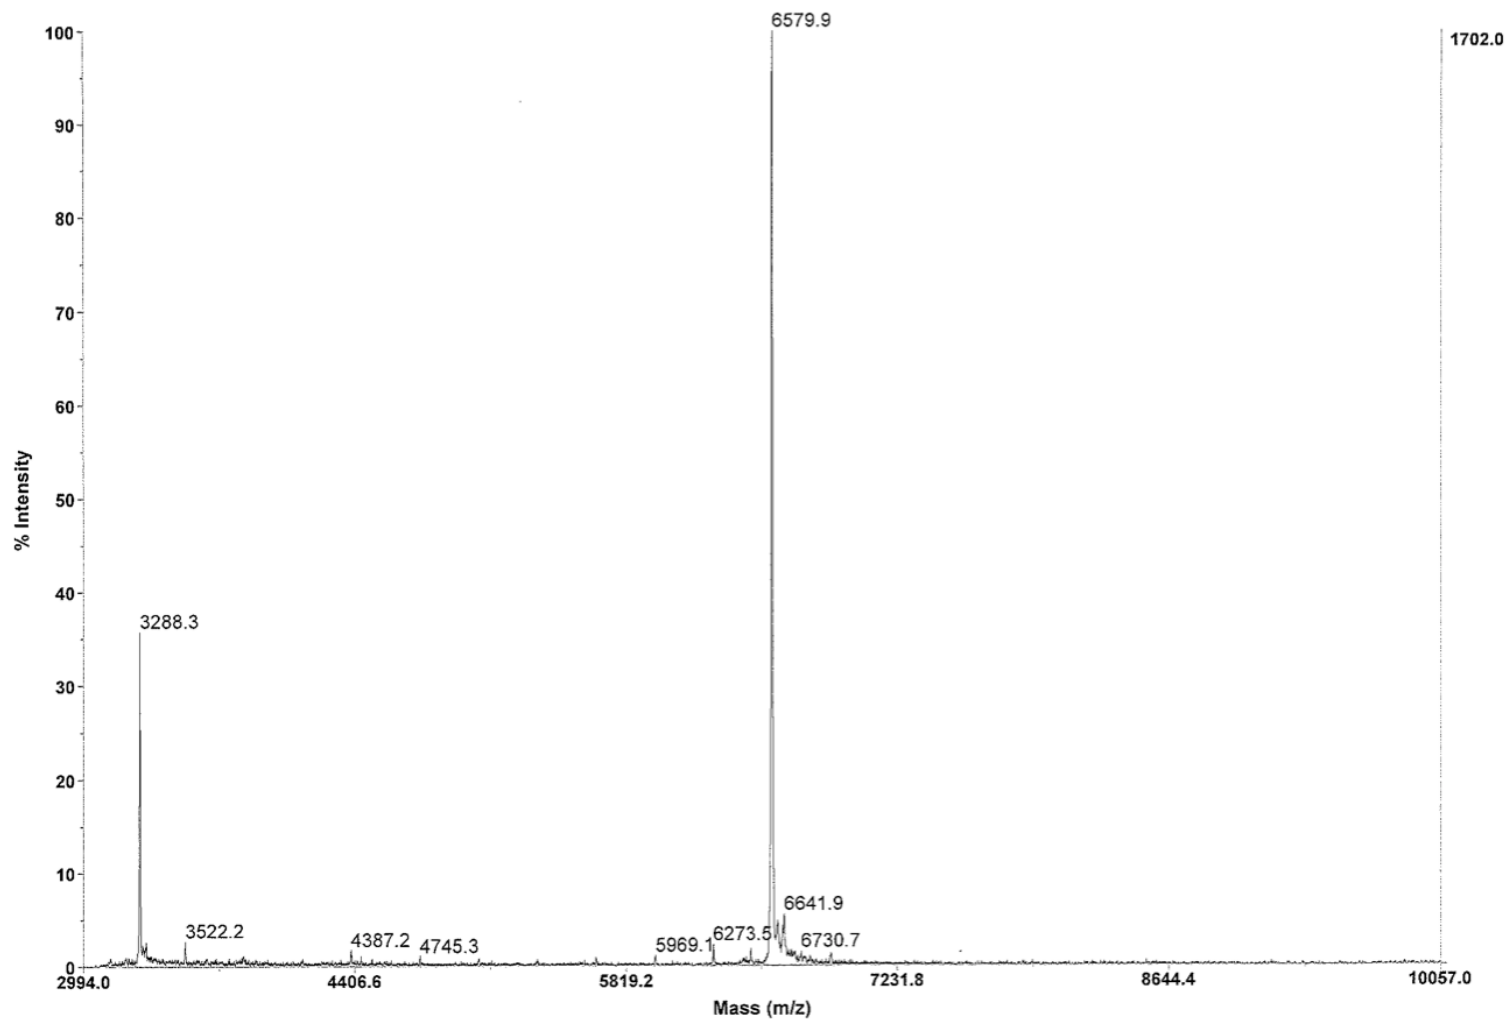

SSmd

MALDI-TOF

Applied Biosystems 4700 Proteomics Analyzer 2011

4700 Linear Spec #1[BP = 6946.9, 340]

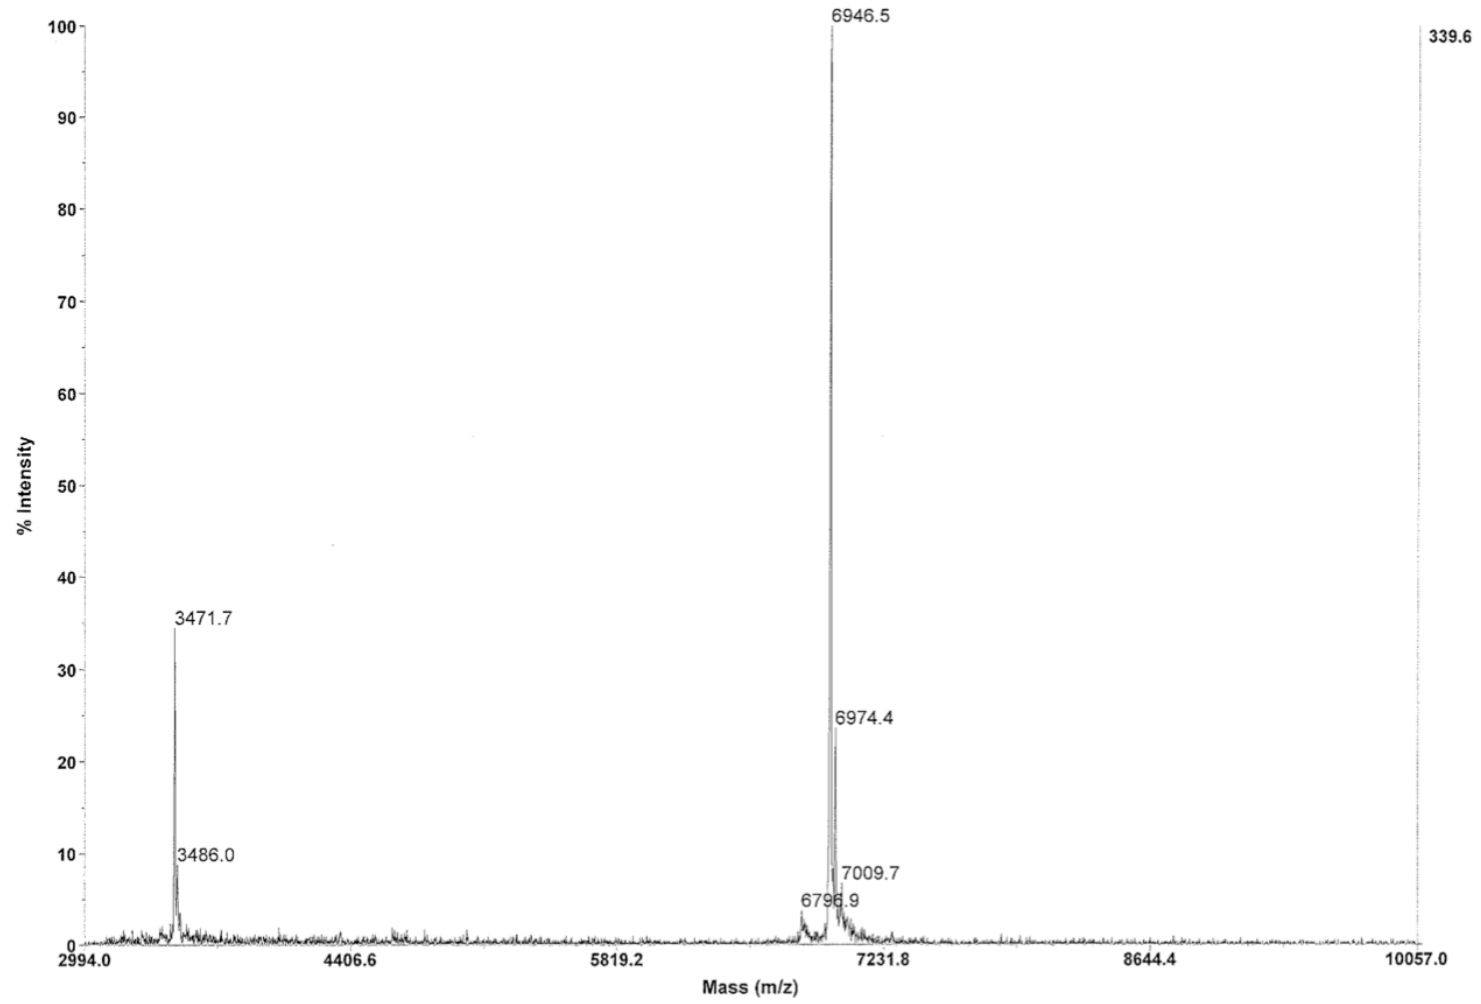

Supplement: c6ra26852h1.pdf [file c6ra26852h1.pdf]
